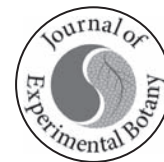

RESEARCH PAPER

# Chloride is beneficial for growth of the xerophyte *Pugionium cornutum* by enhancing osmotic adjustment capacity under salt and drought stresses

Yan-Nong Cui<sup>1</sup>, Xiao-Ting Li<sup>1</sup>, Jian-Zhen Yuan<sup>1</sup>, Fang-Zhen Wang<sup>1</sup>, Huan Guo<sup>1</sup>, Zeng-Run Xia<sup>2</sup>, Suo-Min Wang<sup>1</sup> and Qing Ma<sup>1,\*</sup> 

<sup>1</sup> State Key Laboratory of Grassland Agro-ecosystems, Key Laboratory of Grassland Livestock Industry Innovation, Ministry of Agriculture and Rural Affairs; College of Pastoral Agriculture Science and Technology, Lanzhou University, Lanzhou 730020, P. R. China

<sup>2</sup> Key Laboratory of Se-enriched Products Development and Quality Control, Ministry of Agriculture and Rural Affairs, National-Local Joint Engineering Laboratory of Se-enriched Food Development, Ankang R&D Center for Se-enriched Products, Ankang Shaanxi 725000, P. R. China

\* Correspondence: [maq@lzu.edu.cn](mailto:maq@lzu.edu.cn)

Received 3 December 2019; Editorial decision 19 March 2020; Accepted 25 March 2020

Editor: Hendrik Küpper, Biology Center of the Czech Academy of Sciences, Czech Republic

## Abstract

Chloride (Cl<sup>-</sup>) is pervasive in saline soils, and research on its influence on plants has mainly focused on its role as an essential nutrient and its toxicity when excessive accumulation occurs. However, the possible functions of Cl<sup>-</sup> in plants adapting to abiotic stresses have not been well documented. Previous studies have shown that the salt tolerance of the xerophytic species *Pugionium cornutum* might be related to high Cl<sup>-</sup> accumulation. In this study, we investigated the Cl<sup>-</sup>-tolerant characteristics and possible physiological functions of Cl<sup>-</sup> in the salt tolerance and drought resistance of *P. cornutum*. We found that *P. cornutum* can accumulate a large amount of Cl<sup>-</sup> in its shoots, facilitating osmotic adjustment and turgor generation under saline conditions. Application of DIDS (4,4'-diisothiocyanostilbene-2,2'-disulfonic acid), a blocker of anion channels, significantly inhibited Cl<sup>-</sup> uptake, and decreased both the Cl<sup>-</sup> content and its contribution to leaf osmotic adjustment, resulting in the exacerbation of growth inhibition in response to NaCl. Unlike glycophytes, *P. cornutum* was able to maintain NO<sub>3</sub><sup>-</sup> homeostasis in its shoots when large amounts of Cl<sup>-</sup> were absorbed and accumulated. The addition of NaCl mitigated the deleterious effects of osmotic stress on *P. cornutum* because Cl<sup>-</sup> accumulation elicited a strong osmotic adjustment capacity. These findings suggest that *P. cornutum* is a Cl<sup>-</sup>-tolerant species that can absorb and accumulate Cl<sup>-</sup> to improve growth under salt and drought stresses.

**Keywords:** Chlorine, salt tolerance, drought avoidance, water balance, photosynthesis, desert plant, abiotic stress.

## Introduction

Soil salinity is a major environmental constraint on plant growth and crop production, and is becoming more prevalent in arid and semi-arid regions as a consequence of global climate change and irrigation practices (Munns and Tester, 2008; Li *et al.*, 2017; Nxele *et al.*, 2017; Tahjib-UI-Arif

*et al.*, 2019). Global food requirements are expected to increase by 70–110% by 2050 to meet the needs of the rapidly growing human population (Munns *et al.*, 2012), and the world's major food crops are very sensitive to abiotic stresses, especially salinity and drought (Shabala, 2013).

Therefore, in order to meet the demand for food security, detailed understanding of the mechanisms employed by plants in adaptation to environmental stresses is a high priority for breeding programs to improve crop salt and drought tolerance.

Salinity is characterized by a high concentration of soluble salts in the soil, of which sodium ( $\text{Na}^+$ ) and chloride ( $\text{Cl}^-$ ) are the most common and widespread (Munns and Tester, 2008; Sun *et al.*, 2016). It is well known that  $\text{Na}^+$  is metabolically toxic to plants when it accumulates at high concentrations in the cytoplasm, and it is closely associated with reductions in crop yield in coastal, arid, and semi-arid regions (Deinlein *et al.*, 2014). Although  $\text{Cl}^-$  is a beneficial micronutrient for higher plants and it is involved in enzyme activation, photosynthetic water oxidation, electrical neutralization of cationic groups, and synthesis of phytohormones (Xu *et al.*, 2000; White and Broadley, 2001; Teakle and Tyerman, 2010; Franco-Navarro *et al.*, 2016; Raven, 2017), under saline conditions the  $\text{Cl}^-$  content in tissues unavoidably accumulates to toxic levels (i.e. significantly higher than normal requirements), since plasma depolarization induced by  $\text{Na}^+$  uptake can result in a high electrochemical gradient that leads to a rapid influx of  $\text{Cl}^-$  into the roots through anion channels (Tyerman and Skerrett, 1999; White and Broadley, 2001; Saleh and Plieth, 2013; Li *et al.*, 2017). For some conventional and staple crop species, such as wheat, most legumes (e.g. *Glycine max*, *Vicia faba*, and *Lotus creticus*), grapevine (*Vitis* spp.), citrus (*Citrus* spp.), and avocado (*Persea americana*), the reduced yield under salt stress is more commonly associated with the over-accumulation of  $\text{Cl}^-$  rather than that of  $\text{Na}^+$  in shoot tissues (for reviews see Teakle and Tyerman, 2010; Li *et al.*, 2017). Thus,  $\text{Cl}^-$  toxicity is also a principal factor restricting agricultural productivity in saline environments (Geilfus, 2018).

Salt tolerance in plants is a complex trait, and it is mainly determined by the ability to decrease ionic toxicity (Munns and Tester, 2008; Teakle and Tyerman, 2010; Tang *et al.*, 2015). The mechanisms employed by higher plants to tolerate  $\text{Na}^+$  toxicity have been studied extensively at both the physiological and molecular levels. Genetic manipulation has already led to improvements in  $\text{Na}^+$  tolerance in a number of crop species, and will ultimately facilitate the breeding of new genotypes with high yields and quality under soil salinity as well as drought (Shabala and Shabala, 2011; Munns *et al.*, 2012; Shabala *et al.*, 2016). In contrast, studies on the  $\text{Cl}^-$  tolerance of plants lag behind, and are mainly focused on the model plant *Arabidopsis* and  $\text{Cl}^-$ -sensitive crop species such as soybean, citrus, and grapevine (Teakle and Tyerman, 2010; Li *et al.*, 2017).  $\text{Cl}^-$  sensitivity in these crop species is actually not a consequence of the greater metabolic toxicity of  $\text{Cl}^-$  compared with  $\text{Na}^+$ , but rather is due to the lack of ability to translocate excessive  $\text{Cl}^-$  to decrease its toxicity, for instance by its exclusion from roots, its restriction to woody stems, or by its sequestration in the vacuoles of photosynthetic organs (Li *et al.*, 2017; Raven, 2017; Wege *et al.*, 2017; Geilfus, 2018). According to Xu *et al.* (2000) and White and Broadley (2001), a tissue  $\text{Cl}^-$  content of  $\sim 4\text{--}7 \text{ mg g}^{-1}$  DW is

toxic to  $\text{Cl}^-$ -sensitive species, while up to  $15\text{--}50 \text{ mg g}^{-1}$  DW can be toxic to  $\text{Cl}^-$ -tolerant species, and this is indicative of a much more prominent translocation ability in tolerant species than in sensitive ones. Studies of  $\text{Cl}^-$ -tolerant species and their evolved mechanisms for coping with  $\text{Cl}^-$  toxicity are therefore of particular value for improving agricultural productivity.

*Pugionium* is a genus in the Brassicaceae with relatively few species and is widely distributed in central Asia (Wang *et al.*, 2017). The major species, *Pugionium cornutum*, is a xerophytic desert plant that is primarily found in arid and semi-arid regions of north-western China and has strong adaptability to various environmental stresses, including salinity and drought (Yu *et al.*, 2010; Yue *et al.*, 2016a, 2016b; Wang *et al.*, 2017). In local areas, *P. cornutum* and the related *P. dolabratum* are pioneer species in terms of ecological restoration. They develop large and deep root systems with a horizontal distribution of 60–80 cm and a main root that can extend to 150 cm depth, which contributes to water and soil conservation; their branching shoots also mean that the plants serve as wind-breaks to stabilize sand (Li *et al.*, 2015; Wang *et al.*, 2017). *Pugionium cornutum* is a traditional Chinese medicinal herb of high value, and is a popular vegetable and forage species that has been found to contain rich amounts of dietary fibre, protein, and vitamins, and relatively low amounts of fat and sugar (Li *et al.*, 2015). In the arid regions of north-western China, where many xerophytes such as *Zygophyllum xanthoxylum*, *Haloxylon ammodendron* and *P. cornutum* are widely distributed,  $\text{Na}^+$  and  $\text{Cl}^-$  are abundant ions in the soil, as intense evaporation lifts various salts containing  $\text{Na}^+$  and  $\text{Cl}^-$  from underground water sources and into the plant rhizosphere (Ning *et al.*, 2001; Chang *et al.*, 2013). It has been reported that *Z. xanthoxylum* and *H. ammodendron* can accumulate extremely high amounts of  $\text{Na}^+$  in their leaves as an important osmoticum to improve plant growth under salt and drought stresses (Wang *et al.*, 2004; Ma *et al.*, 2012; Yue *et al.*, 2012). However, the possible functions of  $\text{Cl}^-$  in adaptation to abiotic stresses in desert plants have not been well documented, even in higher plants.

Previous studies have found that the growth of *P. cornutum* under NaCl treatments is not inhibited even though the shoot  $\text{Cl}^-$  content drastically increases to  $\sim 30 \text{ mg g}^{-1}$  DW (Yue *et al.*, 2016a, 2016b), suggesting that it is likely to be a  $\text{Cl}^-$ -tolerant species. Given that  $\text{Cl}^-$  is thought to be an inorganic osmoticum for plants due to its contribution to turgor-driven stomatal opening and improvement of leaf turgor pressure (De Angeli *et al.*, 2013; Franco-Navarro *et al.*, 2016, 2019), we hypothesized that it plays a specific role in *P. cornutum* to cope with salt and drought stresses. In this study, to assess  $\text{Cl}^-$ -tolerant characteristics of *P. cornutum*, we first examined the response of seedlings to different  $\text{Cl}^-$  and  $\text{NO}_3^-$  salts. Then, to study the possible functions of  $\text{Cl}^-$  in salt tolerance, we examined the effects of a blocker of  $\text{Cl}^-$  uptake in plants on seedlings subjected to NaCl treatment. Finally, the effects of additional moderate NaCl on the growth of seedlings under osmotic stress were investigated to study the possible function of  $\text{Cl}^-$  in the drought resistance of *P. cornutum*.

## Materials and methods

### Plant material and growth conditions

Seeds of *Pugionium cornutum* were collected from the Mu Us Sandland in the Inner Mongolia Autonomous Region, China. After removal of the bracts, the seeds were surface-sterilized in 5% NaClO for 10 min, rinsed six times with distilled water, soaked in distilled water for 1 d, and then germinated at 28 °C in the dark. After 5 d, the seedlings were transplanted to 0.5 l plastic pots filled with coarse silica sand, with one seedling per pot. The pots were 12 cm in height, with a bottom diameter of 8 cm and a top diameter of 10 cm. The pots were irrigated with modified half-strength Hoagland solution consisting of 2 mM KNO<sub>3</sub>, 0.5 mM KH<sub>2</sub>PO<sub>4</sub>, 0.5 mM MgSO<sub>4</sub>, 0.5 mM Ca(NO<sub>3</sub>)<sub>2</sub>, 60 μM Fe-citrate, 50 μM H<sub>3</sub>BO<sub>3</sub>, 10 μM MnCl<sub>2</sub>, 1.6 μM ZnSO<sub>4</sub>, 0.6 μM CuSO<sub>4</sub>, and 0.05 μM Na<sub>2</sub>MoO<sub>4</sub>; the pH was adjusted to 5.7 using 1 M Tris. The solution was prepared using deionized water and replenished once every 3 d. Previous studies have shown that this solution satisfactorily meets the nutrient requirements for normal growth of *P. cornutum* (Yue *et al.*, 2016a, 2016b), and we also found that the seedlings did not experience any typical symptoms of Cl<sup>-</sup> deficiency (Supplementary Fig. S1 at JXB online), such as leaf wilting, bronzing, or necrosis (Xu *et al.*, 2000; White and Broadley, 2001; Franco-Navarro *et al.*, 2016). All seedlings were grown in a greenhouse with a photoperiod of 16/8 h light/dark at 28/23°C, 60% relative humidity, and photosynthetic photon flux density of ~500 μmol m<sup>-2</sup> s<sup>-1</sup>.

After 1 month, uniform seedlings were selected and used for the three independent experiments. First, to investigate the Cl<sup>-</sup>-tolerant characteristics, seedlings were grown for 2 weeks in either modified half-strength Hoagland solution (control) or half-strength Hoagland solution containing additional 50 mM KCl, 50 mM KNO<sub>3</sub>, 50 mM NaCl, or 50 mM NaNO<sub>3</sub>. The osmotic potentials of these four salt solutions were the same (-0.27 MPa), as determined using a cryoscopic osmometer (Osmomat-030, Gonotec GmbH, Berlin, Germany). Second, to investigate the functions of Cl<sup>-</sup> in salt tolerance, seedlings were grown for 10 d in either half-strength Hoagland solution (control), or half-strength Hoagland solution containing 25 μM 4,4'-diisothiocyanostilbene-2,2'-disulfonic acid (DIDS), 50 mM NaCl, or 50 mM NaCl together with 25 μM DIDS. DIDS is a non-permeating amino acid, and 25 μM is sufficient to block Cl<sup>-</sup> influx channels activated by plasma membrane depolarization, but has no effect on cation channels in protoplasts derived from wheat roots (Skerrett and Tyerman, 1994; Tavakkoli *et al.*, 2011). Moreover, DIDS is known to efficiently inhibit Cl<sup>-</sup> uptake in Arabidopsis and barley under NaCl treatment (Tavakkoli *et al.*, 2011; Saleh and Plieth, 2013). Third, to investigate the functions of Cl<sup>-</sup> in resistance to drought (simulated by osmotic stress), seedlings were grown for 5 d in either half-strength Hoagland solution (control) or half-strength Hoagland solution containing sorbitol, 25 mM NaCl, sorbitol plus 25 mM NaCl, or sorbitol plus both 25 mM NaCl and 25 μM DIDS, with all these treatments having a final osmotic potential of -0.3 MPa except for 25 mM NaCl that had a osmotic potential of -0.13 MPa as no sorbitol was supplied in this treatment solution. The pH values of the treatment solutions were all adjusted to 5.7 using 1 M Tris.

The solutions were replenished once every 3 d. To minimize the effects of possible environmental gradients in the greenhouse, the pots were randomly reassigned to new positions every day. At the end of the treatment period, photosynthesis-related parameters were determined for the seedlings, which were then harvested for measurements and analyses of other physiological parameters (described below). Six replicate seedlings were used for all measurements.

### Determination of plant biomass, relative growth rate, and water content

The roots and shoots of individual seedlings were carefully separated and the fresh weights were immediately measured. All samples were then oven-dried at 80 °C for 3 d to obtain dry weights.

The relative growth rate (RGR, g kg<sup>-1</sup> d<sup>-1</sup>) of whole plants was calculated as  $(\ln W_f - \ln W_i) / (\Delta t \times 1000)$ , where  $W_i$  is the initial DW (g) of the whole plant (i.e. before treatment) and  $W_f$  is the final DW (i.e.

after treatment), and  $\Delta t$  is the time (d) between the two measurements (Martínez *et al.*, 2005).

The relative water content (RWC, g g<sup>-1</sup> DW) was calculated as  $(FW - DW) / DW$  (Yue *et al.*, 2012).

### Measurements of photosynthesis-related parameters

The leaf net photosynthesis rate ( $P_n$ ) and stomatal conductance ( $g_s$ ) were measured in the greenhouse between 3 h and 5.5 h after the start of the photoperiod using an open infrared portable gas-exchange fluorescence system (GFS-3000, Heinz Walz GmbH, Effeltrich, Germany) equipped with a 2×4-cm leaf chamber. During the measurements, the temperature in the leaf chamber was set at 25°C, relative humidity at 50%, photosynthetic photon flux density at 1000±50 μmol m<sup>-2</sup> s<sup>-1</sup>, and CO<sub>2</sub> concentration at 420±20 μmol mol<sup>-1</sup>. Measurements were taken on the middle-upper part of an individual fully expanded mature leaf, which was placed in the chamber for ~5 min until the readings for  $P_n$  and  $g_s$  were stable. The intrinsic water use efficiency (WUE<sub>i</sub>) was calculated as  $P_n/g_s$  (Ran *et al.*, 2010).

The chlorophyll in fresh leaf samples was extracted with 80% acetone and 95% ethanol (1:1, v/v). After centrifugation, the supernatant was collected and the absorbance was measured at 645 nm and 663 nm using a UV spectrophotometer (UV-2102C, Unico Instrument Co., Ltd, Shanghai, China). The chlorophyll (Chl) *a* and Chl *b* contents were then calculated according to Inskeep and Bloom (1985).

### Determination of leaf area and relative membrane permeability

For determination of leaf area, the top leaves of the second pair of branches (one top leaf from each branch; the youngest emerged branches were considered the first pair of branches) were scanned using an Epson Perfection 4870 photo-scanner, after which the mean area of the pair of leaves was measured using ImageJ (v.1.31; <https://imagej.nih.gov/ij/>). The relative membrane permeability (RMP) of the leaves was assessed according to the method described by Gibon *et al.* (1997). Fresh leaves were shaken gently in deionized water at 25 °C for 2 h, after which the initial electrolyte leakage ( $E_1$ ) was measured using a conductivity meter (EC215, Hanna Instruments, Padovana, Italy). The leaves were then incubated in a boiling water bath for 1 h, after which the total electrolyte leakage ( $E_2$ ) was measured. The RMP (%) was calculated as  $(E_1/E_2) \times 100$ .

### Observations of leaf epidermal and mesophyll cells

The top leaves of the second pair of branches (see above) were used for the observations of leaf epidermal and mesophyll cells. An Apero S SEM (ThermoFisher Scientific) was used to obtain images of the adaxial epidermal cells, after which the cell sizes were analysed using ImageJ. For examination of the mesophyll (palisade and spongy cells), leaf tissues were fixed overnight in FAA solution (4% formaldehyde, 5% acetic acid, 50% ethanol), dehydrated through a graded ethanol series, and then embedded in Paraplast Plus (Sigma-Aldrich), as described by Langdale (1994) and Franco-Navarro *et al.* (2016). Cross-sections (8 μm) of the leaf samples were then obtained using a microtome (RM2245, Leica) and stained with Toluidine Blue (Sigma-Aldrich). The cross-sections were imaged using a fluorescence microscope (DM6B/DFC7000T, Leica), and the leaf thickness was then determined using ImageJ.

### Determination of tissue cation and anion contents

The K<sup>+</sup> and Na<sup>+</sup> contents in the roots and shoots were determined according to the methods of Wang *et al.* (2007). Briefly, the roots were washed with ice-cold 20 mM LiNO<sub>3</sub> to exchange cell wall-bound salts, and the shoots were rinsed in deionized water to remove any surface salts. After oven-drying at 80 °C for 3 d, K<sup>+</sup> and Na<sup>+</sup> ions in the tissues were extracted using 100 mM acetic acid at 90 °C for 2 h, and the K<sup>+</sup> and Na<sup>+</sup> contents were then determined using a flame spectrophotometer (Model 410 Flame; Sherwood Scientific, Ltd., Cambridge, UK). The Cl<sup>-</sup> and NO<sub>3</sub><sup>-</sup> in oven-dried roots and shoots were extracted with deionized water at 100 °C for 2 h, after which Cl<sup>-</sup> was determined by ion

chromatography (ICS 2000, Dionex, Sunnyvale, CA, USA) according to the method of Yang *et al.* (2008), and  $\text{NO}_3^-$  was determined by the colorimetric method using the UV-2102C spectrophotometer as described by Drechsler *et al.* (2015).

The  $\text{Cl}^-$  uptake rate (CIUR,  $\text{nmol g FW}^{-1} \text{ min}^{-1}$ ) was calculated using the equation described by Wang *et al.* (2009) as  $(C_2 - C_1) / (\text{FW} \times \Delta t)$ , where  $C_1$  and  $C_2$  are the amounts of  $\text{Cl}^-$  in whole plants before and after treatment, respectively, FW is the root fresh weight (g), and  $\Delta t$  is the elapsed time (min).

#### Determination of free proline, soluble sugars, betaine, and malate contents in the leaves

Free proline in the leaves was extracted with 3% sulfosalicylic acid in a boiling water bath for 10 min. After centrifugation, the supernatant was reacted with 2.5% acid-ninhydrin and glacial acetic acid in a boiling water bath to produce colouration. The free proline was then leached with toluene and measured using the UV-2102C spectrophotometer according to the method described by Bates *et al.* (1973). The soluble sugars in the leaves was extracted with 80% ethanol in a boiling water bath for 1 h and quantified using the classic anthrone method with the UV spectrophotometer, according to the methods of Pe'er and Cohen (1987). The betaine in the leaves was extracted with 80% methanol at 60 °C for 30 min, and then the content was measured using a Reinecke Salt Kit (Comin Biotechnology, Co. Ltd., Suzhou, China), as described by Pan *et al.* (2016). The malate in the leaves was extracted with 80% ethanol at 75 °C for 30 min. After centrifugation, the malate in the supernatant was quantified as described by Yan *et al.* (2019) using a HPLC system (Model 1260, Agilent Technologies Inc.).

#### Determination of leaf water potential, osmotic potential, turgor pressure, and contributions of solutes to the osmotic potential

The leaf water potential ( $\Psi_w$ ) was measured using a PSYPRO water potential system (C-52 Sample Chamber, Wescor Inc.) according to the manufacturer's instructions. The leaf osmotic potential ( $\Psi_s$ ) was determined according to the method described by Ma *et al.* (2012). Fresh leaf samples were briefly frozen in liquid nitrogen, thawed, and the sap was collected using a syringe. The sap was centrifuged at 9000 g for 5 min, after which the osmolality of the supernatant was analysed using the Osmomat-030 cryoscopic osmometer at 25 °C. The readings ( $n$ ,  $\text{mmol kg}^{-1}$ ) were used to calculate  $\Psi_s$  (MPa) with the van't Hoff equation as  $-nRT$ , where  $R$  is the gas constant ( $0.008314 \text{ m}^3 \text{ MPa mol}^{-1} \text{ K}^{-1}$ ) and  $T$  is the thermodynamic temperature (298.8 K). Leaf turgor pressure ( $\Psi_t$ ) was estimated using the following equation (Ueda *et al.*, 2003):  $\Psi_t = \Psi_w - \Psi_s$ . The  $\Psi_s$  values of inorganic and organic solutes (calculated osmotic potential, COP) were calculated using the van't Hoff equation as described by Guerrier (1996) and Pan *et al.* (2016). The percentage contributions of solutes to leaf osmotic potential (C) were estimated as  $C = (\text{COP} / \Psi_s) \times 100$ .

#### Data analysis

All parameters were determined using six replicates. The data were subjected to one-way ANOVA using SPSS 19.0 Followed by Tukey's HSD to detect significant differences between means.

## Results

### Effects of $\text{Cl}^-$ and $\text{NO}_3^-$ salt treatments on growth

Previous studies have indicated that *P. cornutum* probably has a high tolerance to  $\text{Cl}^-$  toxicity (Yue *et al.*, 2016a, 2016b). Therefore, we first confirmed the  $\text{Cl}^-$ -tolerant characteristics in *P. cornutum* and identified possible relevant physiological mechanisms by comparing its responses to  $\text{Cl}^-$  and  $\text{NO}_3^-$  salts.

When seedlings were grown under control conditions, shoot growth was robust and all leaves were healthy, indicating that *P. cornutum* irrigated with half-strength Hoagland solution grew normally (Fig. 1A). Interestingly, after treatment with 50 mM KCl, the shoot growth appeared to be much better than under control conditions; moreover, RGR, shoot FW and DW, shoot RWC, leaf area,  $P_n$ , and  $g_s$  were all significantly increased compared with the control (Fig. 1A–F, Supplementary Fig. S2A, B). Although the 50 mM  $\text{KNO}_3$  treatment also increased the shoot RWC, leaf area,  $P_n$ , and  $g_s$  compared with the control, almost all the growth and photosynthesis parameters were clearly lower than those in the plants treated with KCl (Fig. 1B–F, Supplementary Fig. S2A, B). Compared with the control, the 50 mM NaCl treatment decreased RGR, shoot FW and RWC,  $P_n$ ,  $g_s$ , and Chl *a* content, but it had no effect on shoot DW and leaf area (Fig. 1A–F, Supplementary Fig. S2A–C). For plants treated with  $\text{NaNO}_3$ , it was observed that the tips of the old leaves were withered, and shoot growth as well as leaf photosynthesis were repressed, accompanied by a large increase in RMP under the  $\text{NaNO}_3$  treatment compared to all the other treatments (Fig. 1, Supplementary Fig. S2). These results indicated that the growth of *P. cornutum* under treatment with  $\text{Cl}^-$  salts was much better than that under treatment with  $\text{NO}_3^-$  salts, regardless of whether the cation was  $\text{K}^+$  or  $\text{Na}^+$ .

### Accumulation of ion and organic osmotica and osmotic adjustment under treatment with $\text{Cl}^-$ and $\text{NO}_3^-$ salts

Compared with the control, both the KCl and  $\text{KNO}_3$  treatments significantly increased the tissue  $\text{K}^+$  content, while both the NaCl and  $\text{NaNO}_3$  treatments significantly decreased it (Fig. 2A). Both the NaCl and  $\text{NaNO}_3$  treatments increased the shoot  $\text{Na}^+$  content from trace amounts under control conditions to  $\sim 1.5 \text{ mmol g}^{-1} \text{ DW}$  (Fig. 2B). Similarly, the shoot  $\text{Cl}^-$  content under the KCl and NaCl treatments increased significantly (to  $\sim 2 \text{ mmol g}^{-1} \text{ DW}$  and  $\sim 1.5 \text{ mmol g}^{-1} \text{ DW}$ , respectively) compared to the control (Fig. 2C). The  $\text{KNO}_3$  and  $\text{NaNO}_3$  treatments both significantly increased the tissue  $\text{NO}_3^-$  content to the same extent compared with the control (Fig. 2D). Whilst large amounts of  $\text{Cl}^-$  accumulated in the shoots under the KCl and NaCl treatments, the shoot  $\text{NO}_3^-$  content remained constant compared with the control (Fig. 2C, D), indicating that the accumulation of  $\text{Cl}^-$  had no adverse effects on  $\text{NO}_3^-$  homeostasis in the shoots.

Compared with the control, none of the salt treatments had an effect on contents of soluble sugars, betaine, and malate in leaves, but the two  $\text{Na}^+$  treatments, especially  $\text{NaNO}_3$ , significantly increased the free proline content (Supplementary Fig. S3). As most plants accumulate high amounts of proline in their leaves when confronted with abiotic stresses (Munns and Tester, 2008), this high content may indicate that the 50 mM  $\text{NaNO}_3$  treatment exerted the most severe stress on growth.

Leaf  $\Psi_w$  was unaltered under the  $\text{KNO}_3$  treatment and increased under the KCl treatment compared with the control (Table 1), suggesting that leaf hydration was stable in plants treated with  $\text{KNO}_3$  and even improved in those treated with KCl. By contrast, leaf  $\Psi_w$  under the two  $\text{Na}^+$ -salt treatments

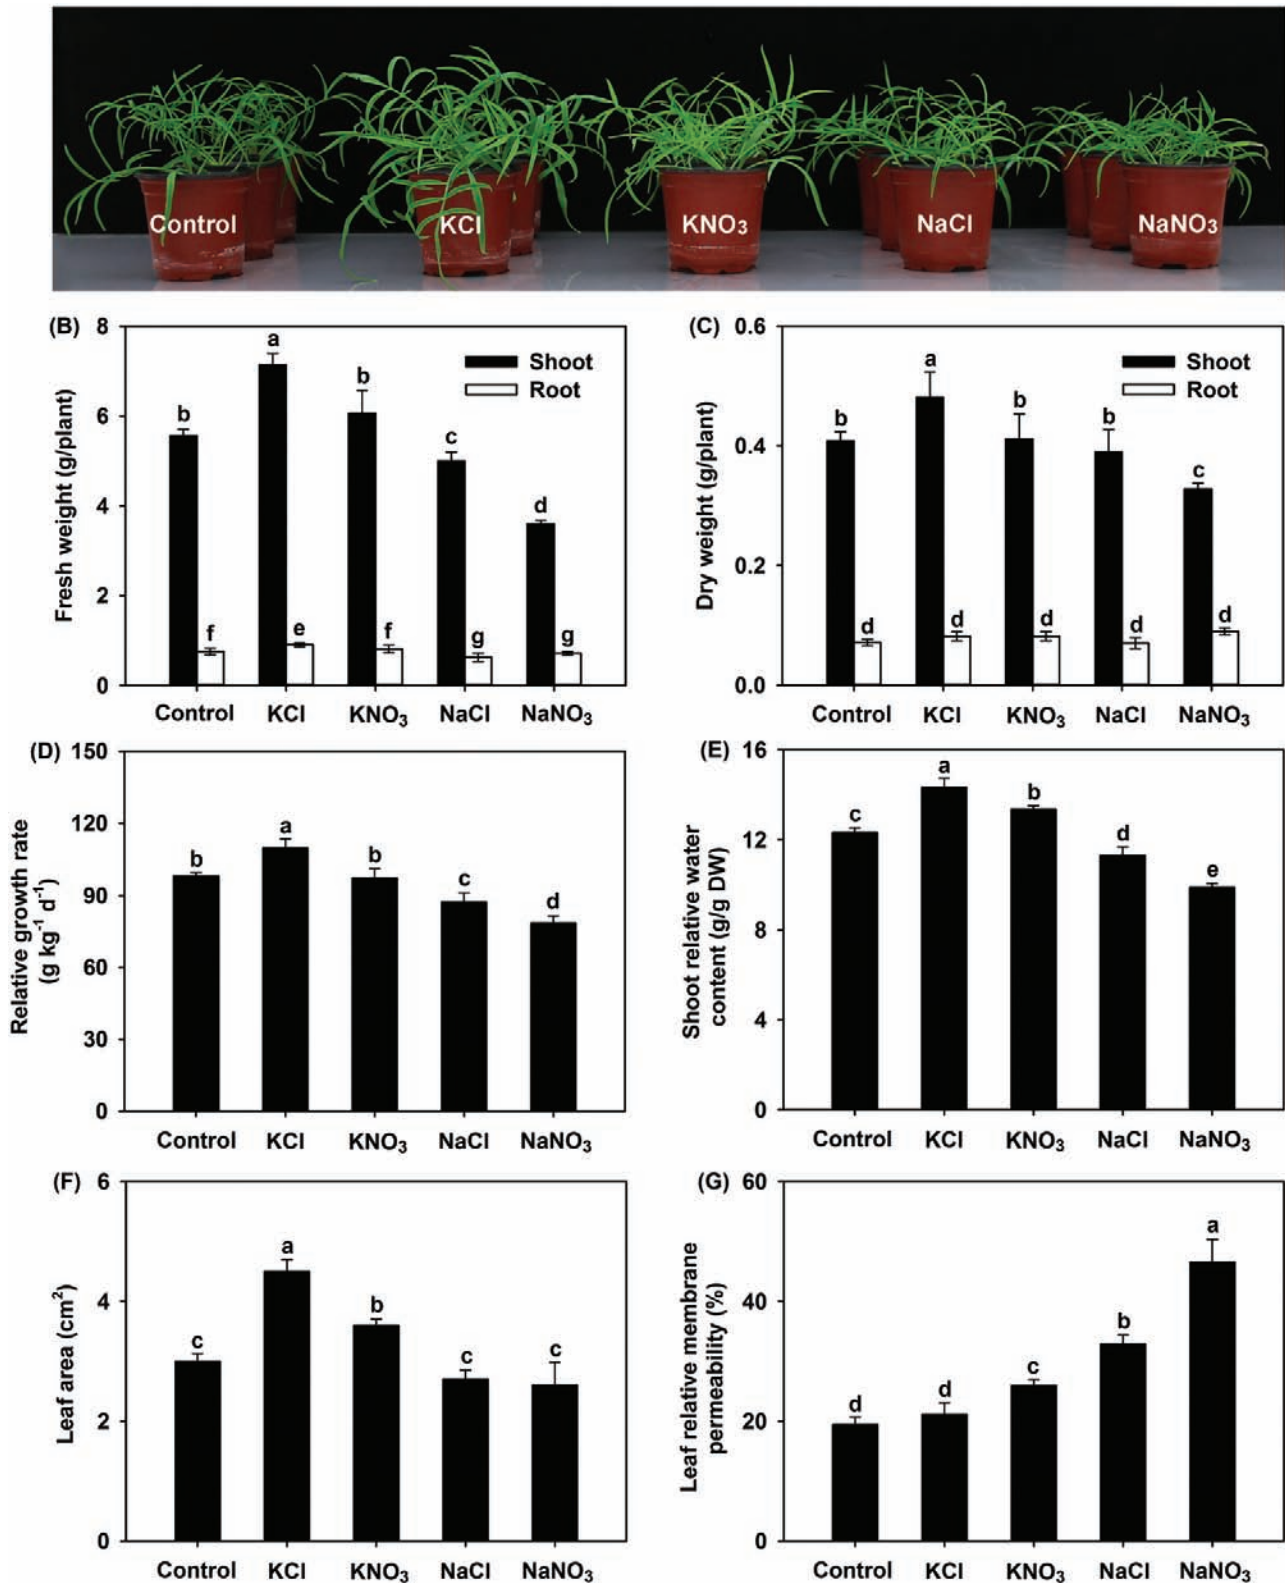

**Fig. 1.** Effects of different Cl<sup>-</sup> and NO<sub>3</sub><sup>-</sup> salts on growth and physiological indexes of *P. cornutum*. (A) Growth, (B) tissue FW, (C) tissue DW, (D) relative growth rate, (E) shoot relative water content, (F) leaf area, and (G) leaf relative membrane permeability. Plants were grown in half-strength Hoagland solution alone (Control) or with addition of 50 mM of either KCl, KNO<sub>3</sub>, NaCl, or NaNO<sub>3</sub>. Data are means (±SD), *n*=6. Different letters indicate significant differences as determined using Tukey's HSD test (*P*<0.05). (This figure is available in colour at *JXB* online.)

was significantly lower than that of the control, especially for NaNO<sub>3</sub>. All four salt treatments significantly decreased leaf  $\Psi_s$  compared with the control (Table 1), indicating that

*P. cornutum* could accumulate high amounts of osmotically active solutes in its leaves when confronted with saline conditions. Compared with the control, the two K<sup>+</sup>-salt treatments

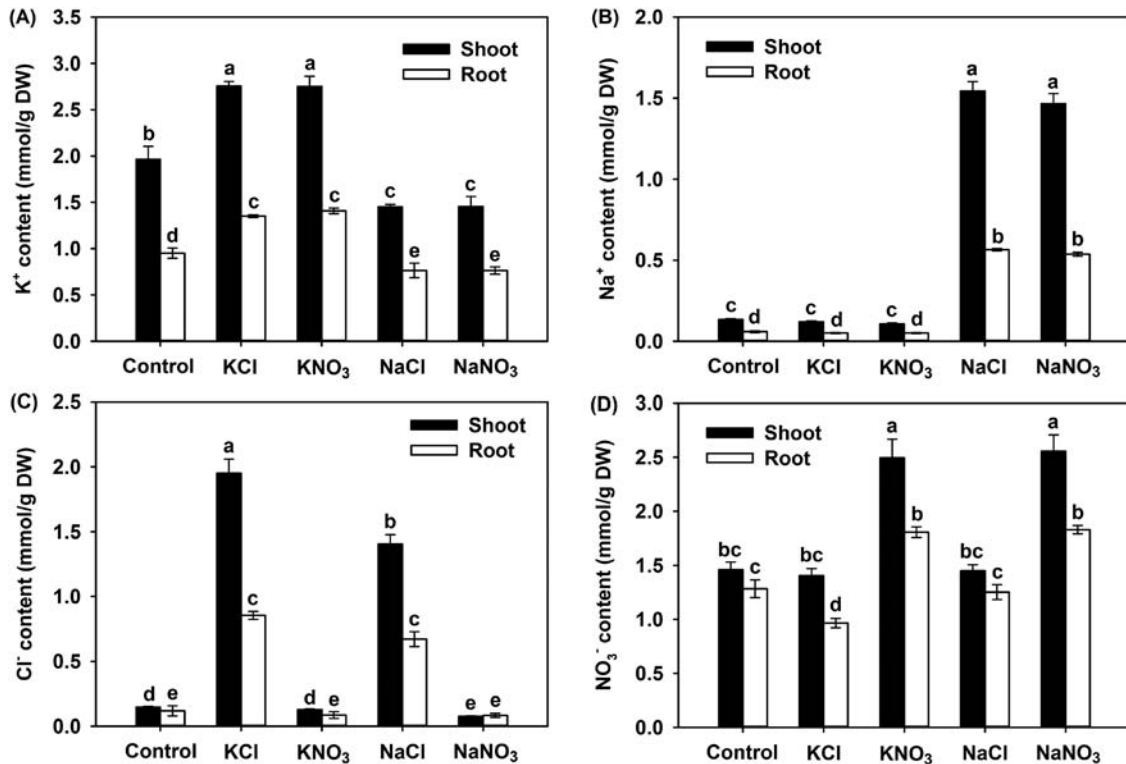

**Fig. 2.** Effects of different Cl<sup>-</sup> and NO<sub>3</sub><sup>-</sup> salts on the tissue contents of ions in *P. cornutum*. Shoot and root contents of (A) K<sup>+</sup>, (B) Na<sup>+</sup>, (C) Cl<sup>-</sup>, and (D) NO<sub>3</sub><sup>-</sup>. Plants were grown in half-strength Hoagland solution alone (Control) or with addition of 50 mM of either KCl, KNO<sub>3</sub>, NaCl, or NaNO<sub>3</sub>. Data are means (±SD), *n*=6. Different letters indicate significant differences as determined using Tukey's HSD test (*P*<0.05).

**Table 1.** Leaf water potential ( $\Psi_w$ ), osmotic potential ( $\Psi_s$ ), and turgor pressure ( $\Psi_t$ ) of *P. cornutum* in response to treatment with KCl, KNO<sub>3</sub>, NaCl, and NaNO<sub>3</sub>

| Treatment         | Leaf $\Psi_w$ (MPa)     | Leaf $\Psi_s$ (MPa)      | Leaf $\Psi_t$ (MPa)    |
|-------------------|-------------------------|--------------------------|------------------------|
| Control           | -0.40±0.02 <sup>b</sup> | -1.07±0.03 <sup>a</sup>  | 0.67±0.02 <sup>c</sup> |
| KCl               | -0.29±0.01 <sup>a</sup> | -1.59±0.05 <sup>c</sup>  | 1.30±0.05 <sup>a</sup> |
| KNO <sub>3</sub>  | -0.38±0.06 <sup>b</sup> | -1.37±0.06 <sup>b</sup>  | 0.99±0.03 <sup>b</sup> |
| NaCl              | -0.87±0.05 <sup>c</sup> | -1.45±0.06 <sup>b</sup>  | 0.58±0.03 <sup>d</sup> |
| NaNO <sub>3</sub> | -1.11±0.05 <sup>d</sup> | -1.51±0.08 <sup>bc</sup> | 0.40±0.02 <sup>e</sup> |

Plants were grown in half-strength Hoagland solution alone (Control), or with addition of salts applied at 50 mM. Data are means (±SD), *n*=6. Different letters indicate significant differences between treatments as determined using Tukey's HSD test (*P*<0.05).

significantly increased leaf  $\Psi_t$ , especially for KCl, while the two Na<sup>+</sup>-salt treatments, especially NaNO<sub>3</sub>, significantly reduced  $\Psi_t$  (Table 1). Since  $\Psi_t$  is essential for the volume expansion of leaf epidermal and mesophyll cells in tobacco leaves (Franco-Navarro et al., 2016, 2019), we examined the leaf tissue morphology of the *P. cornutum* seedlings under the different treatments. We found that treatment with KNO<sub>3</sub> resulted in enlarged epidermal and palisade cells compared with those of the control (Figs 3A, C, 4A, C). This effect was enhanced with KCl treatment, where the epidermal, palisade, and spongy cells were clearly larger than under the KNO<sub>3</sub> treatment (Figs 3B, C, 4B, C). Furthermore, the epidermal cells in plants treated with KCl appeared more turgid than for KNO<sub>3</sub> (Figs 3B, C). Measurements based on the microscope images indicated that the greatest leaf epidermal cell sizes and leaf thickness were

present under the KCl treatment (Figs 3F, 4F). No obvious differences in leaf cell morphology were observed between the control the NaCl treatment (Figs 3A, D, 4A, D), whereas under the NaNO<sub>3</sub> treatment the palisade cells were shrunken and leaf thickness declined (Fig. 4D–F), suggesting that turgor generation in plants treated with NaCl was stronger than that in plants treated with NaNO<sub>3</sub>.

#### Effects of application of DIDS on growth and accumulation of ion and organic osmotica under treatment with 50 mM NaCl

The results presented above confirmed that growth and osmotic adjustment were better under treatment with Cl<sup>-</sup> salts than under treatment with NO<sub>3</sub><sup>-</sup> salts, which suggested that the large accumulation of Cl<sup>-</sup> might be important for *P. cornutum* to cope with saline conditions. To investigate this further, we used DIDS, a blocker of anion channels in plants, to inhibit Cl<sup>-</sup> uptake in plants grown under treatment with 50 mM NaCl. Under control conditions, parameters related to both growth and photosynthesis were unchanged following the application of 20 μM DIDS (Fig. 5, Supplementary Fig. S4), and hence DIDS itself had no detrimental effects on the plants. In contrast, under treatment with 50 mM NaCl, the application of DIDS resulted in the tips of old leaves becoming withered, and RGR, shoot FW and DW, RWC,  $P_n$ ,  $g_s$ , and the Chl *a* and *b* contents were all significantly decreased (Fig. 5, Supplementary Fig. S4), indicating that blocking the anion channels severely affected the growth of *P. cornutum* under NaCl treatment.

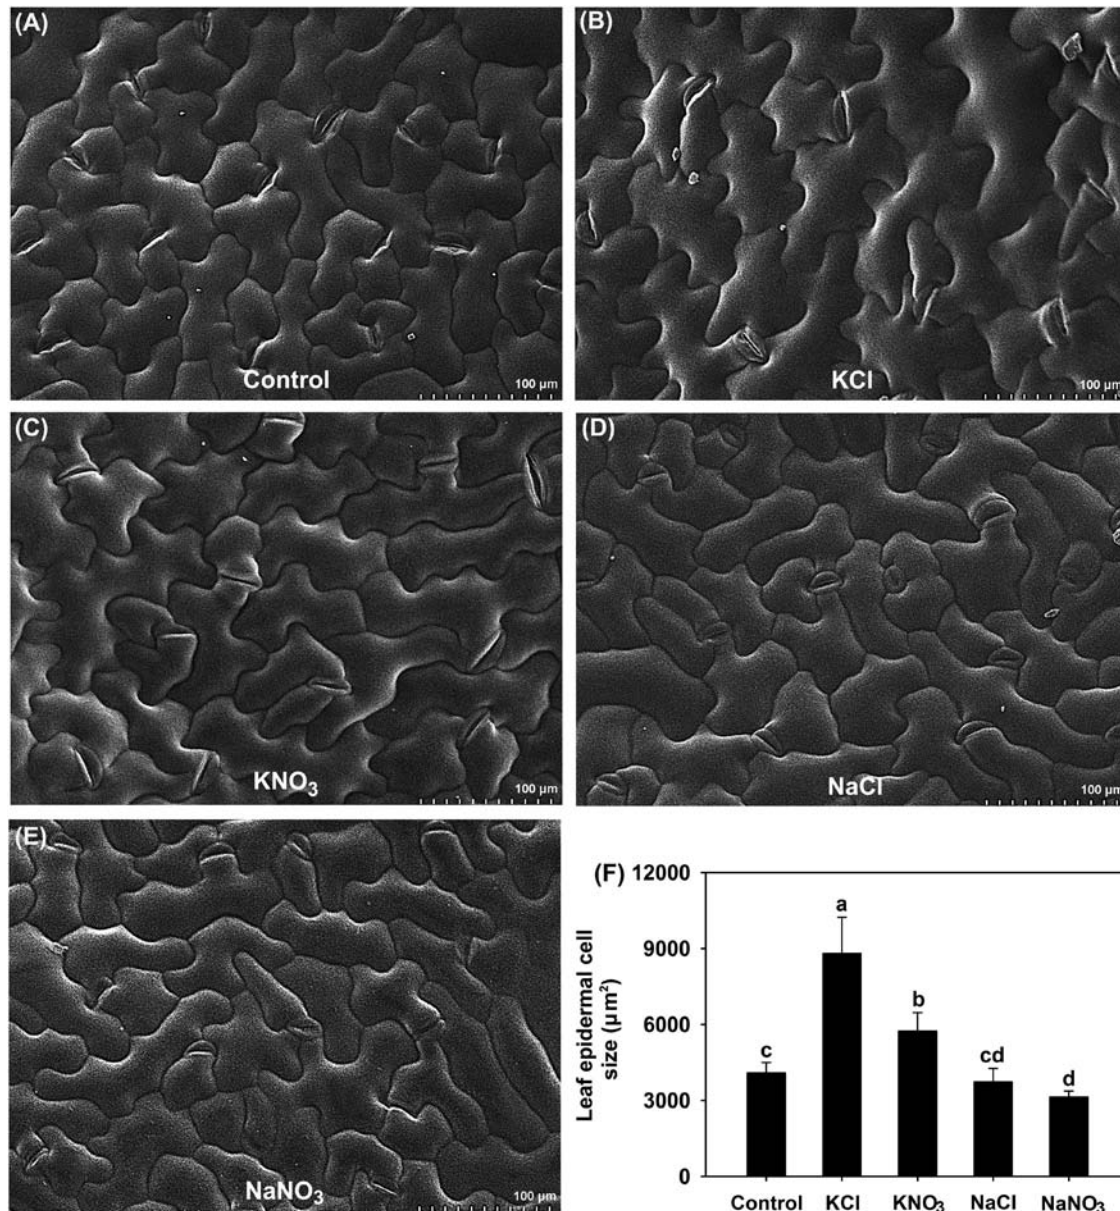

**Fig. 3.** Effects of different Cl<sup>-</sup> and NO<sub>3</sub><sup>-</sup> salts on the growth of leaf epidermal cells in *P. cornutum*. (A–E) SEM images of epidermal cells of plants grown in half-strength Hoagland solution alone (Control) or with addition of 50 mM of either KCl, KNO<sub>3</sub>, NaCl, or NaNO<sub>3</sub>. (F) Sizes of randomly selected cells in each image. Data are means (±SD), *n*=6. Different letters indicate significant differences as determined using Tukey's HSD test (*P*<0.05).

Under control conditions, K<sup>+</sup> and NO<sub>3</sub><sup>-</sup> were the major contributors to leaf  $\Psi_s$ , and the presence of DIDS had no effect on their contents or on their contributions to  $\Psi_s$  (Fig. 6C, E, Table 2). Under the NaCl treatment, application of DIDS did not alter the contents of NO<sub>3</sub><sup>-</sup>, Na<sup>+</sup>, and K<sup>+</sup> or their contributions to leaf  $\Psi_s$ ; however, the Cl<sup>-</sup> uptake rate, tissue contents, and its contribution to leaf  $\Psi_s$  were all significantly decreased (Fig. 6, Table 2). At the same time, the shoot RWC under the NaCl+DIDS treatment was much lower than that under NaCl alone (Fig. 5E), suggesting that the presence of DIDS under the NaCl treatment inhibited Cl<sup>-</sup> absorption and, concomitantly, decreased the accumulation of Cl<sup>-</sup> in the shoots and its contribution to leaf osmotic adjustment, resulting in a lower hydration status of the shoots.

Compared with the control, both the NaCl and NaCl+DIDS treatments resulted in considerable increases in leaf free

proline content but had no effect on the soluble sugar content (Supplementary Fig. S5). However, the total contributions of free proline and soluble sugar to leaf  $\Psi_s$  were very low (<5%) under all growing conditions (Table 2).

#### *Effects of 20 mM NaCl on growth and the accumulation of ion and organic osmotica under osmotic stress of -0.3 MPa*

Having demonstrated that high accumulation of Cl<sup>-</sup> provides *P. cornutum* with a physiological strategy to cope with NaCl stress by enhancing its osmotic adjustment capability, we also investigated the possible role of Cl<sup>-</sup> in adaptation to drought stress (simulated by sorbitol-induced osmotic stress). An osmotic stress (O) of -0.3 MPa alone severely inhibited the growth of seedlings, with RGR, shoot FW and DW,

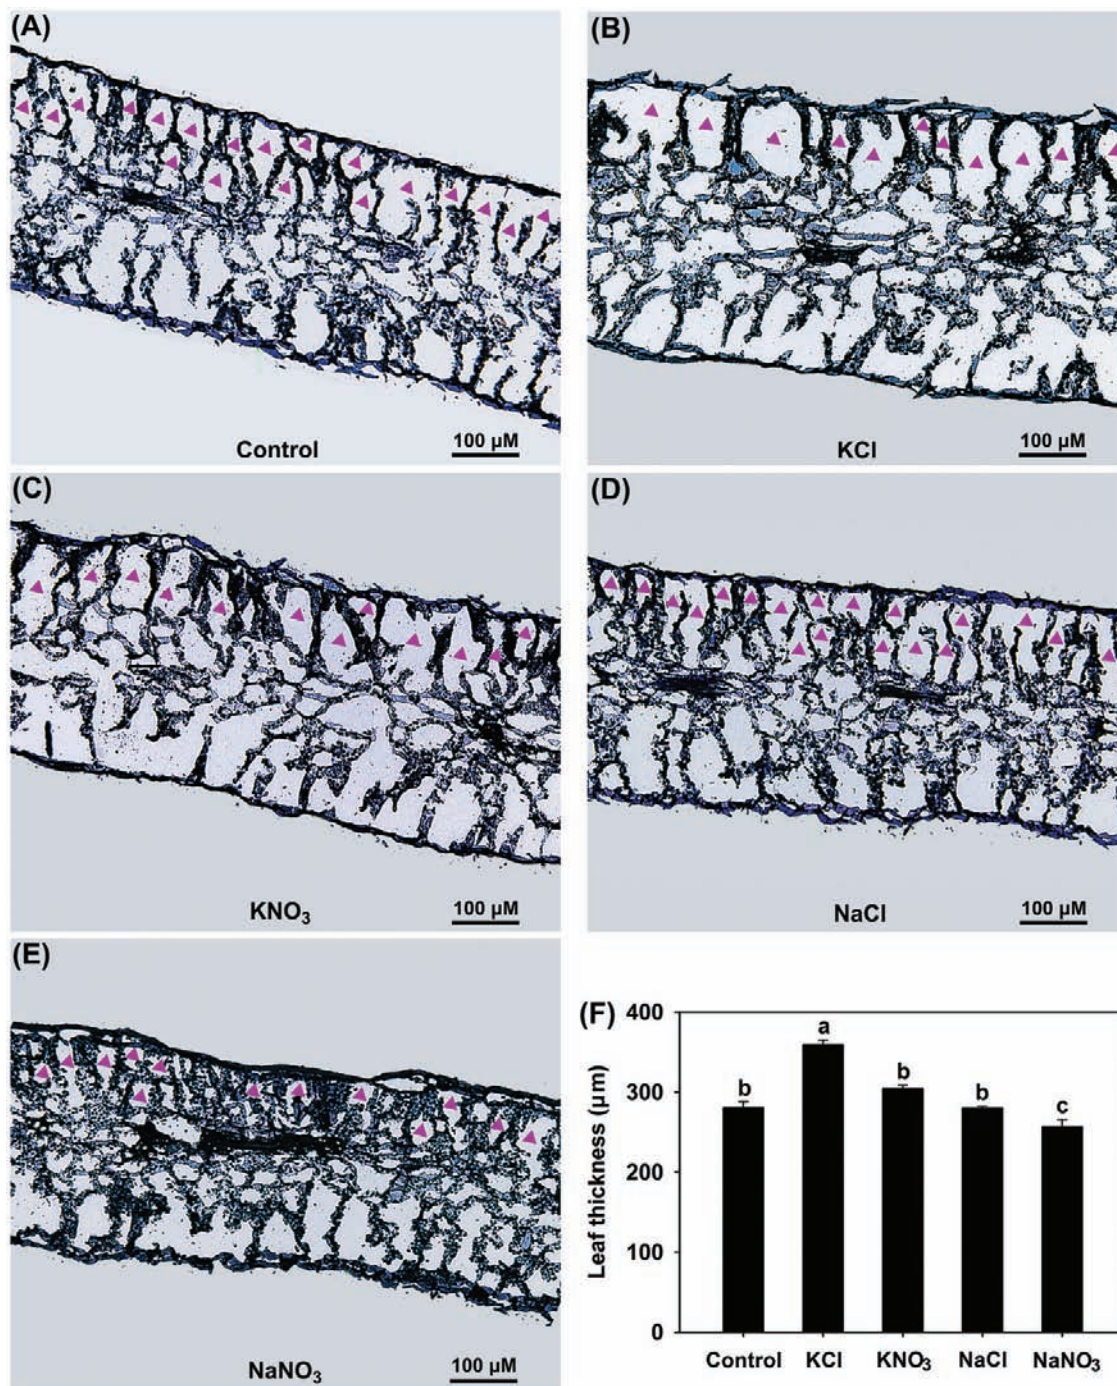

**Fig. 4.** Effects of different  $\text{Cl}^-$  and  $\text{NO}_3^-$  salts on the morphology and thickness of leaves of *P. cornutum*. (A–E) Fluorescence microscopy images of leaf cross-sections of plants grown in half-strength Hoagland solution alone (Control) or with addition of 50 mM of either KCl,  $\text{KNO}_3$ , NaCl, or  $\text{NaNO}_3$ . In each case, the adaxial epidermis is at the top of the image. Palisade cells are indicated by arrowheads, with spongy mesophyll cells below them. (F) Leaf thickness. Data are means ( $\pm$ SD),  $n=6$ . Different letters indicate significant differences as determined using Tukey's HSD test ( $P<0.05$ ). (This figure is available in colour at *JXB* online.)

RWC,  $P_n$ ,  $g_s$ , and Chl *a* and *b* contents all being significantly decreased compared with the control (Fig. 7, Supplementary Fig. S6). The addition of 25 mM NaCl in osmotic stress (O+S treatment) visibly rescued shoot growth and significantly increased RGR, shoot FW and DW, and RWC, and  $P_n$ ,  $g_s$ , and the Chl *a* and *b* contents also improved considerably (Fig. 7, Supplementary Fig. S6), indicating that the addition of NaCl alleviated the detrimental effects of osmotic stress. However,

additional application of 25 μM DIDS (O+S+DIDS) severely repressed shoot growth and significantly decreased RGR, shoot FW and DW, RWC,  $P_n$ ,  $g_s$ , and the Chl *a* and *b* contents (Fig. 7, Supplementary Fig. S6). Both O+S and O+S+DIDS treatment solutions imposed  $-0.3$  MPa osmotic stress on the roots, so the presence of DIDS counteracted the mitigative effects of NaCl on the osmotic stress-induced inhibition of growth. In addition, the intrinsic water use efficiency ( $WUE_i$ )



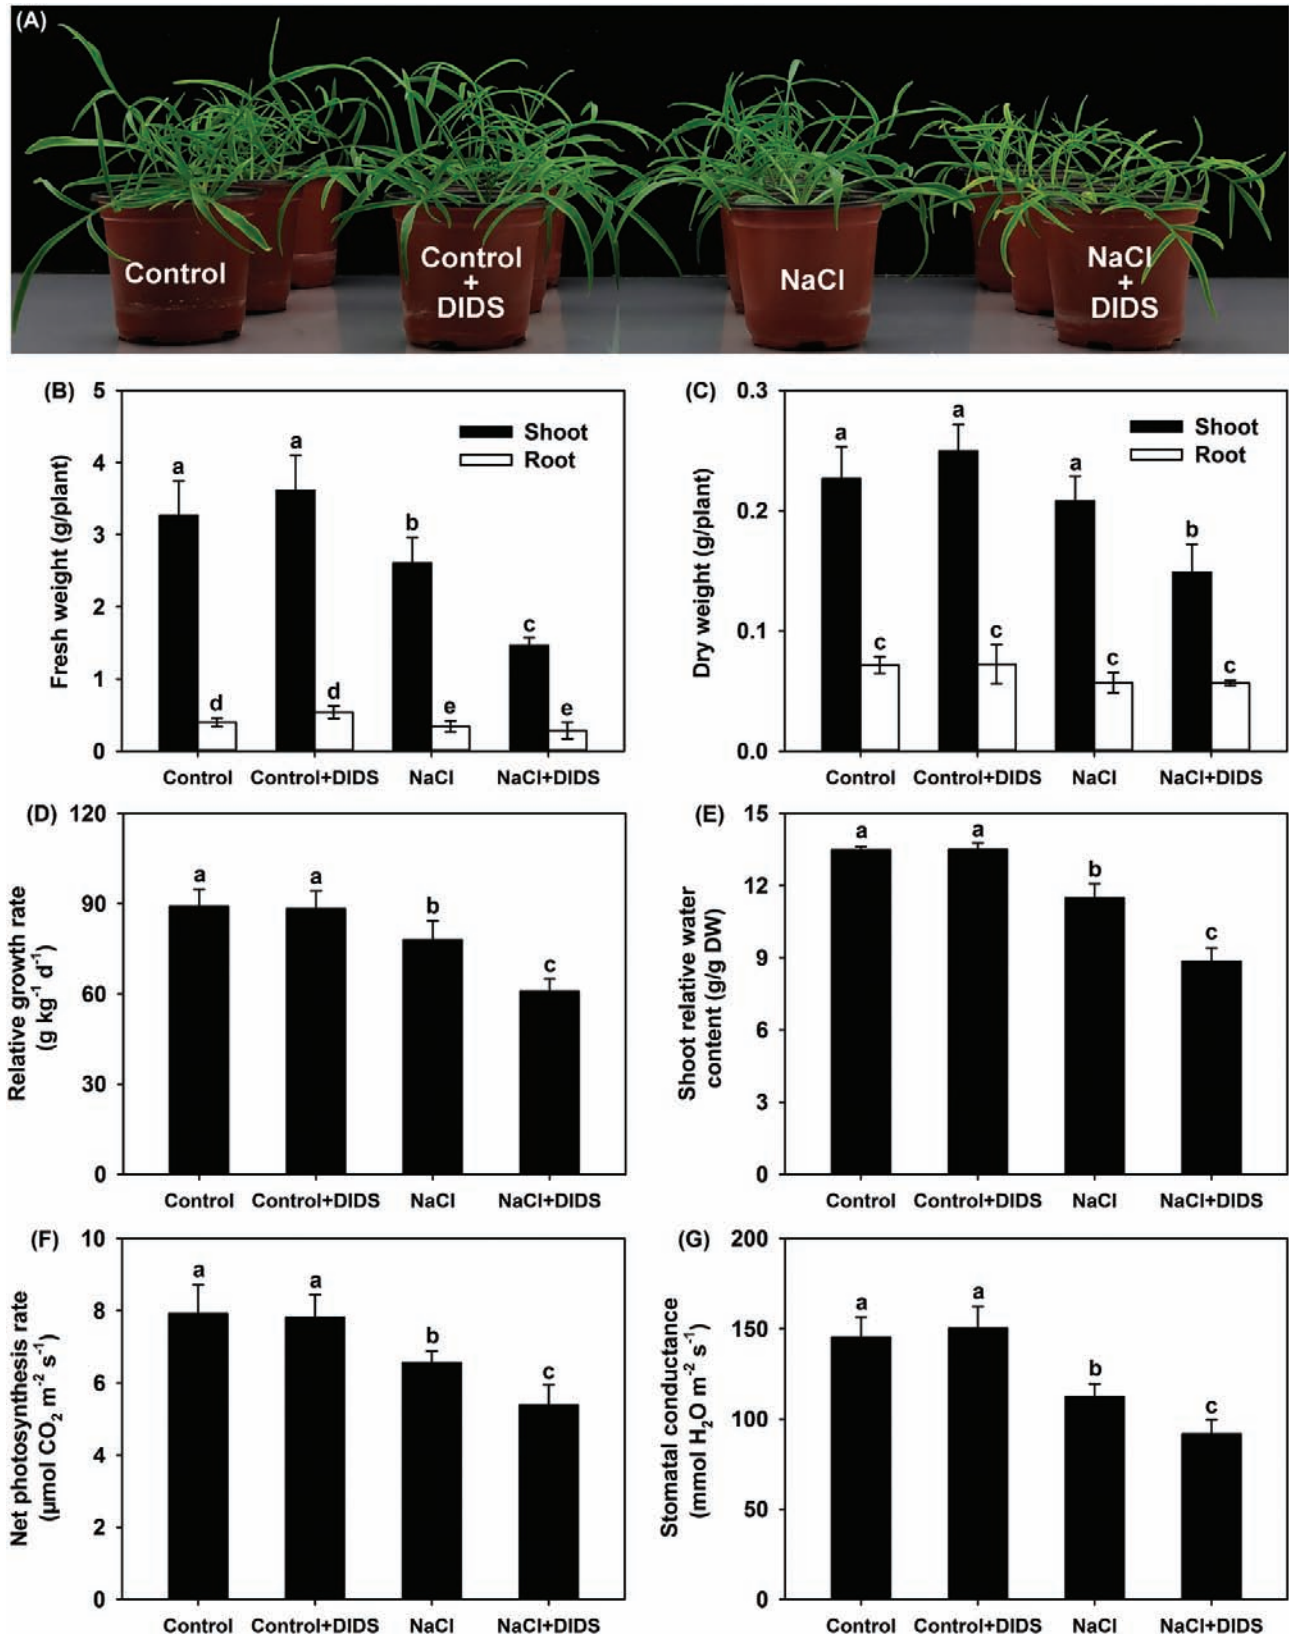

**Fig. 5.** Effects of application of NaCl and the anion channel-blocker DIDS on growth and physiological indexes of *P. cornutum*. (A) Growth, (B) tissue FW, (C) tissue DW, (D) relative growth rate, (E) shoot relative water content, (F) net photosynthetic rate, and (G) stomatal conductance. Plants grown in half-strength Hoagland solution alone (Control), or with addition of 25 μM DIDS, 50 mM NaCl, or 50 mM NaCl and 25 μM DIDS. Data are means (±SD),  $n=6$ . Different letters indicate significant differences as determined using Tukey's HSD test ( $P<0.05$ ). (This figure is available in colour at JXB online.)

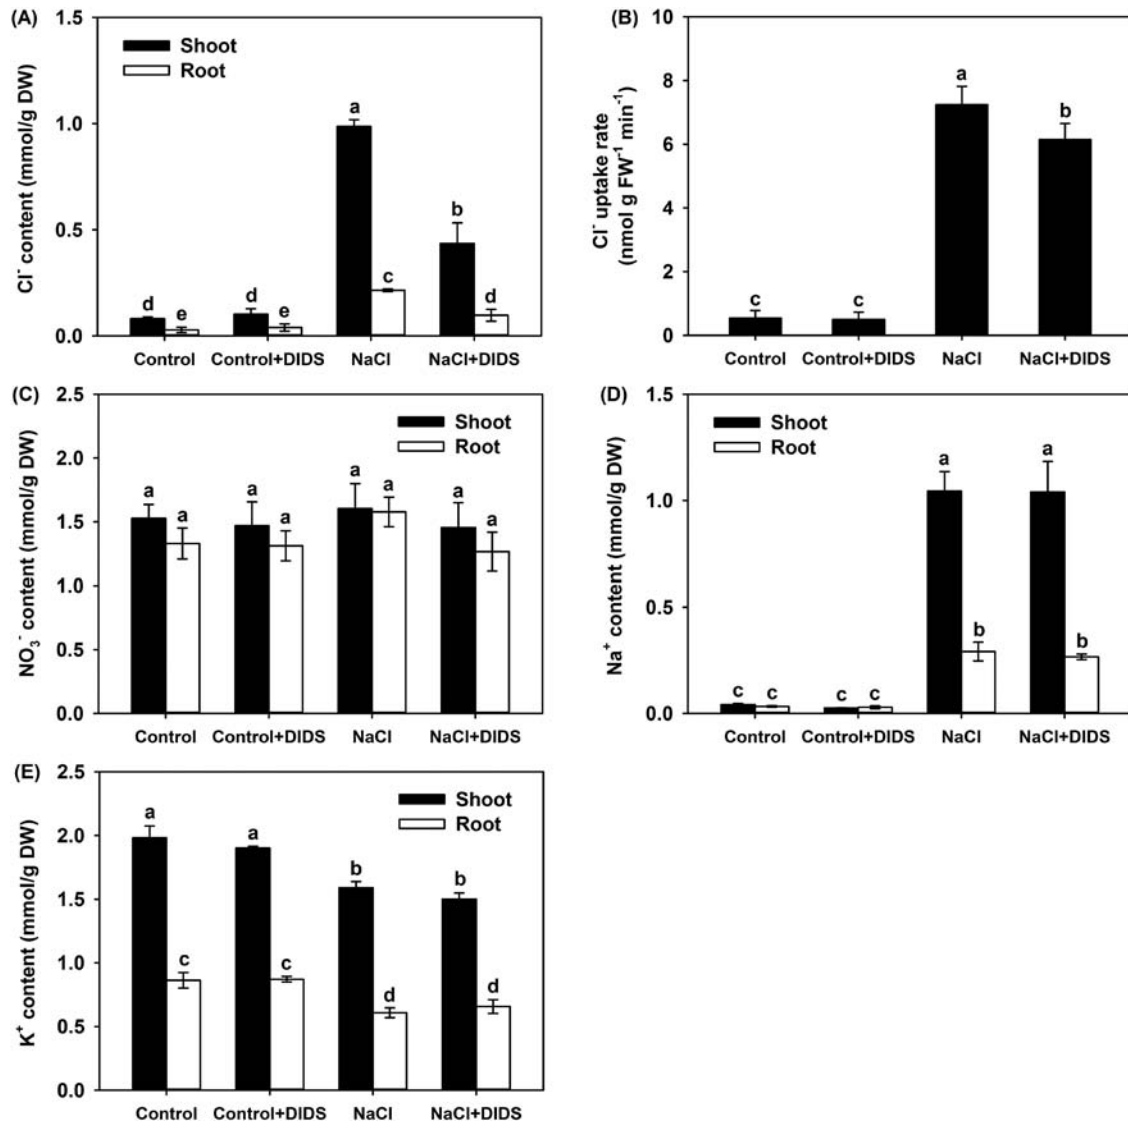

**Fig. 6.** Effects of application of NaCl and the anion channel-blocker DIDS on the tissue contents of ions in *P. cornutum*. (A) Shoot and root contents of  $\text{Cl}^-$  and (B) whole-plant  $\text{Cl}^-$  uptake rate. Shoot and root contents of (C)  $\text{NO}_3^-$ , (D)  $\text{Na}^+$ , and (E)  $\text{K}^+$ . Plants were grown in half-strength Hoagland solution alone (Control), or with addition of 25  $\mu\text{M}$  DIDS, 50 mM NaCl, or 50 mM NaCl and 25  $\mu\text{M}$  DIDS. Data are means ( $\pm$ SD),  $n=6$ . Different letters indicate significant differences as determined using Tukey's HSD test ( $P<0.05$ ).

**Table 2.** Leaf osmotic potential ( $\Psi_s$ ) and the contribution of each individual osmoticum in *P. cornutum* in response to treatment with NaCl with or without application of the anion channel-blocker DIDS

| Treatment    | Leaf $\Psi_s$ (MPa) | Contribution to $\Psi_s$ (%) |                    |                    |                    |                   |                   |
|--------------|---------------------|------------------------------|--------------------|--------------------|--------------------|-------------------|-------------------|
|              |                     | $\text{Na}^+$                | $\text{K}^+$       | $\text{Cl}^-$      | $\text{NO}_3^-$    | Free proline      | Soluble sugars    |
| Control      | $-1.02 \pm 0.02^a$  | $0.51 \pm 0.05^b$            | $35.75 \pm 1.49^a$ | $1.78 \pm 0.17^c$  | $26.68 \pm 7.19^a$ | $0.08 \pm 0.01^b$ | $3.61 \pm 0.01^a$ |
| Control+DIDS | $-1.01 \pm 0.04^a$  | $0.53 \pm 0.05^b$            | $33.66 \pm 2.56^a$ | $2.01 \pm 0.10^c$  | $26.39 \pm 3.31^a$ | $0.08 \pm 0.01^b$ | $3.58 \pm 0.05^a$ |
| NaCl         | $-1.42 \pm 0.08^b$  | $20.20 \pm 1.17^a$           | $24.03 \pm 1.14^b$ | $19.83 \pm 0.33^a$ | $26.83 \pm 4.28^a$ | $1.22 \pm 0.16^a$ | $2.97 \pm 0.04^b$ |
| NaCl+DIDS    | $-1.40 \pm 0.07^b$  | $19.41 \pm 0.86^a$           | $26.23 \pm 0.76^b$ | $7.61 \pm 0.51^b$  | $26.02 \pm 7.73^a$ | $1.02 \pm 0.23^a$ | $1.97 \pm 0.03^c$ |

Plants were grown in half-strength Hoagland solution alone (Control), or with addition of 25  $\mu\text{M}$  DIDS, 50 mM NaCl, or 50 mM NaCl and 25  $\mu\text{M}$  DIDS. Data are means ( $\pm$ SD),  $n=6$ . Different letters indicate significant differences between treatments as determined using Tukey's HSD test ( $P<0.05$ ).

under the O treatment was substantially higher than in the control (Supplementary Fig. S6C), indicating that increasing  $\text{WUE}_i$  may be an important strategy employed by *P. cornutum* in response to drought conditions.

The  $\text{Cl}^-$  content in the shoots and the  $\text{Cl}^-$  uptake rate (CIUR) were 43% and 40% higher, respectively, under the

O treatment than in the control and were 24% and 23% higher, respectively, under the O+S treatment compared with the S treatment (Fig. 8), indicating that osmotic stress resulted in an increase in the uptake and accumulation of  $\text{Cl}^-$ . Correspondingly, the contribution of  $\text{Cl}^-$  to leaf  $\Psi_s$  increased significantly from 2% in the control to 6% under the

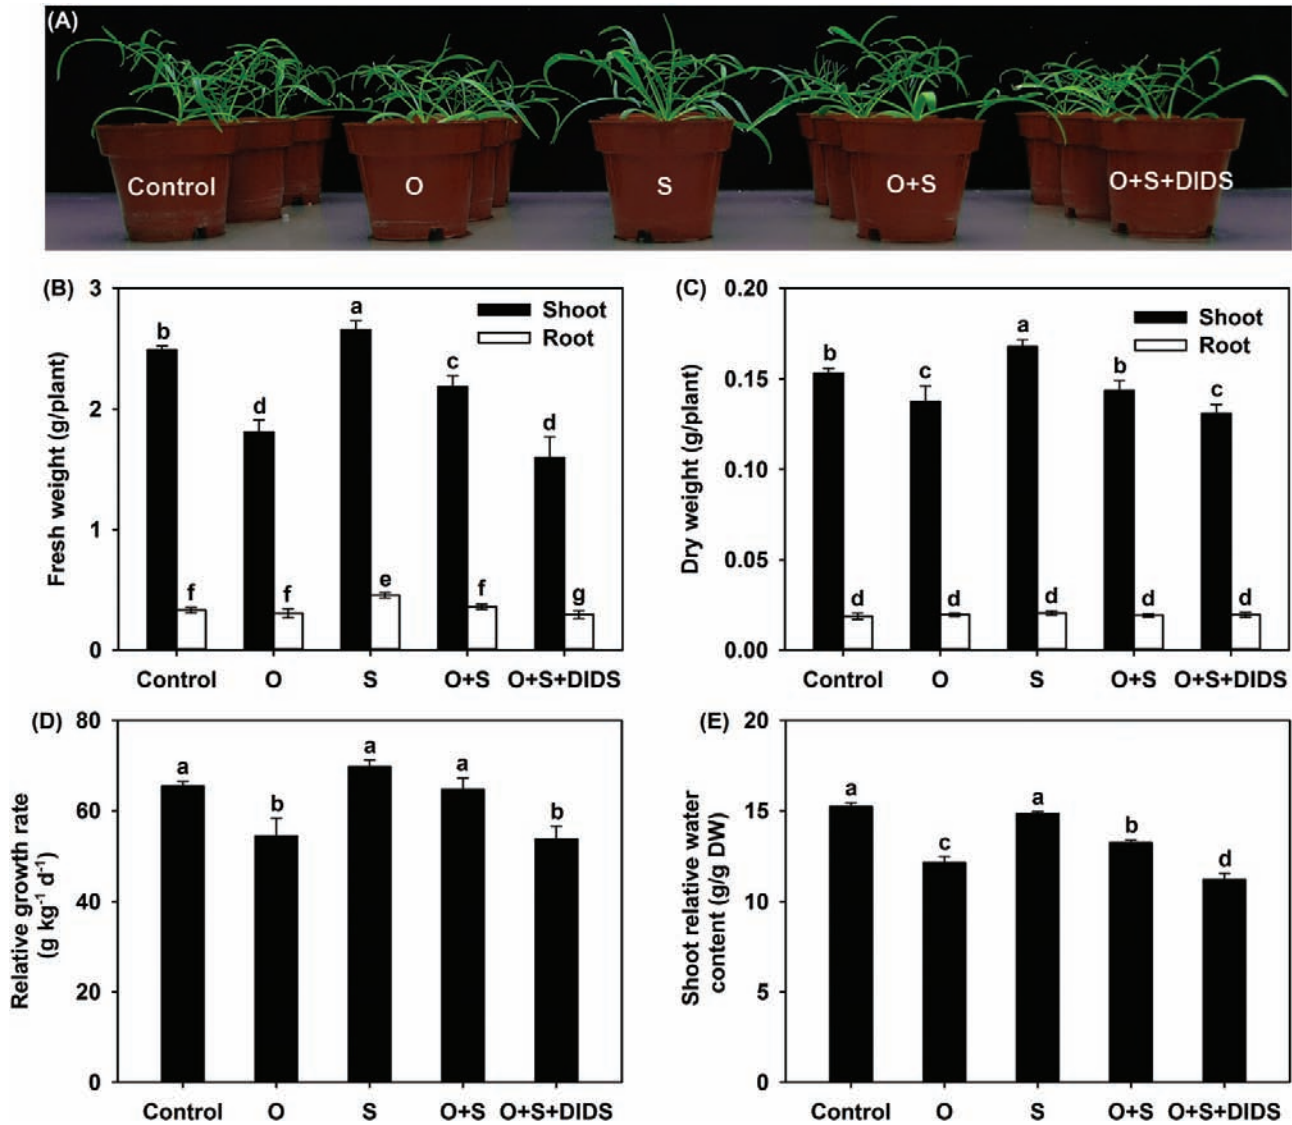

**Fig. 7.** Effects of osmotic stress, salinity, and the anion channel-blocker DIDS on growth and physiological indexes of *P. cornutum*. (A) Growth, (B) tissue FW, (C) tissue DW, (D) relative growth rate, and (E) shoot relative water content. Plants were grown in half-strength Hoagland solution alone (Control), or with the addition of sorbitol to an osmotic stress of  $-0.3$  MPa (O), or with the addition of 25 mM NaCl (S). Osmotic and salinity stresses were also applied together (O+S), and with the addition of 25  $\mu$ M DIDS (O+S+DIDS). Data are means ( $\pm$ SD),  $n=6$ . Different letters indicate significant differences as determined using Tukey's HSD test ( $P<0.05$ ). (This figure is available in colour at JXB online.)

O treatment, and from 9% under the S treatment to 14% under the O+S treatment (Table 3). In contrast, under the O and O+S treatments the tissue Na<sup>+</sup> and NO<sub>3</sub><sup>-</sup> contents as well as the contribution of Na<sup>+</sup> to leaf  $\Psi_s$  were unaltered compared with the control and S treatments, respectively; and the shoot K<sup>+</sup> content and the contributions of K<sup>+</sup> and NO<sub>3</sub><sup>-</sup> to  $\Psi_s$  were significantly decreased compared with the control and S treatments, respectively (Table 3, Supplementary Fig. S7A–C). In comparison with the O+S treatment, the O+S+DIDS treatment did not affect the NO<sub>3</sub><sup>-</sup>, Na<sup>+</sup>, and K<sup>+</sup> contents or their contributions to leaf  $\Psi_s$ , but it did significantly reduce the shoot Cl<sup>-</sup> content and the CIUR by 42% and 39%, respectively, resulting in a significant reduction (by almost 50%) in the contribution of Cl<sup>-</sup> to leaf osmotic adjustment (Fig. 8 Table 3, Supplementary Fig. S7A–C).

Although the contents of free proline and soluble sugars under the O and O+S treatments were significantly increased

compared to the control and S treatments, respectively, their contributions to leaf  $\Psi_s$  were less than  $\sim 4\%$  (Table 3, Supplementary Fig. S7D,E), indicating that the role of free proline and soluble sugars in the osmotic adjustment of *P. cornutum* was negligible.

## Discussion

*P. cornutum* is a typical Cl<sup>-</sup>-tolerant species that is valuable for characterizing uptake and transport in planta

Cl<sup>-</sup> is toxic to plants when it accumulates to high amounts in tissues, and even for reported Cl<sup>-</sup>-tolerant species, a tissue content of 15–50 mg g<sup>-1</sup> DW can result in severely inhibited growth (Xu *et al.*, 2000; White and Broadley, 2001; Geilfus, 2018). In the present study, *P. cornutum* accumulated Cl<sup>-</sup> to

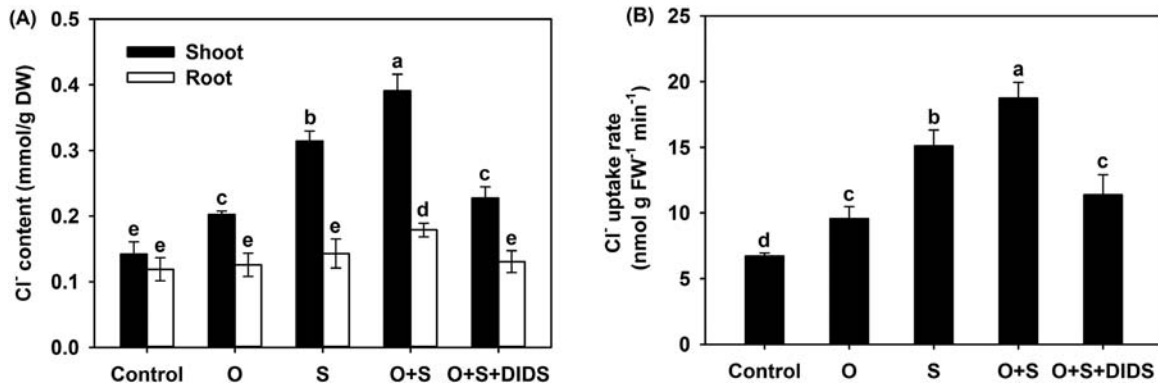

**Fig. 8.** Effects of osmotic stress, salinity, and the anion channel-blocker DIDS on the  $\text{Cl}^-$  content of *P. cornutum*. (A) Shoot and root contents of  $\text{Cl}^-$  and (B) whole-plant  $\text{Cl}^-$  uptake rate. Plants were grown in half-strength Hoagland solution alone (Control), or with the addition of sorbitol to an osmotic stress of  $-0.3$  MPa (O), or with the addition of 25 mM NaCl (S). Osmotic and salinity stresses were also applied together (O+S), and with the addition of 25  $\mu\text{M}$  DIDS (O+S+DIDS). Data are means ( $\pm$ SD),  $n=6$ . Different letters indicate significant differences as determined using Tukey's HSD test ( $P<0.05$ ).

**Table 3.** Leaf osmotic potential ( $\Psi_s$ ) and the contribution of each individual osmoticum in *P. cornutum* in response to osmotic stress (O) and salinity (S) either alone or in combination, and in combination with application of the anion channel-blocker DIDS

| Treatment | Leaf $\Psi_s$ (MPa) | Contribution to $\Psi_s$ (%) |                    |                    |                    |                   |                   |
|-----------|---------------------|------------------------------|--------------------|--------------------|--------------------|-------------------|-------------------|
|           |                     | $\text{Na}^+$                | $\text{K}^+$       | $\text{Cl}^-$      | $\text{NO}_3^-$    | Free proline      | Soluble sugars    |
| Control   | $-0.95 \pm 0.01^a$  | $1.02 \pm 0.10^b$            | $32.50 \pm 1.65^a$ | $2.21 \pm 0.17^c$  | $27.25 \pm 4.65^a$ | $0.07 \pm 0.01^d$ | $3.26 \pm 0.01^a$ |
| O         | $-1.32 \pm 0.03^d$  | $0.92 \pm 0.12^b$            | $23.35 \pm 0.21^b$ | $6.28 \pm 0.46^b$  | $22.93 \pm 3.76^b$ | $0.15 \pm 0.01^b$ | $3.49 \pm 0.01^a$ |
| S         | $-1.16 \pm 0.09^b$  | $7.88 \pm 0.87^a$            | $24.98 \pm 0.67^b$ | $9.04 \pm 0.45^b$  | $27.52 \pm 3.07^a$ | $0.10 \pm 0.03^c$ | $2.41 \pm 0.01^b$ |
| O+S       | $-1.23 \pm 0.07^c$  | $8.42 \pm 0.61^a$            | $20.12 \pm 0.62^c$ | $13.81 \pm 0.57^a$ | $22.54 \pm 2.88^b$ | $0.18 \pm 0.02^a$ | $3.41 \pm 0.02^a$ |
| O+S+DIDS  | $-1.44 \pm 0.01^d$  | $8.38 \pm 0.67^a$            | $23.77 \pm 0.88^b$ | $7.00 \pm 0.44^b$  | $22.23 \pm 4.15^b$ | $0.17 \pm 0.01^a$ | $3.17 \pm 0.02^a$ |

Plants were grown in half-strength Hoagland solution alone (Control), or with the addition of sorbitol to an osmotic stress of  $-0.3$  MPa (O), or with the addition of 25 mM NaCl (S). Osmotic and salinity stresses were also applied together (O+S), and with the addition of 25  $\mu\text{M}$  DIDS (O+S+DIDS). Data are means ( $\pm$ SD),  $n=6$ . Different letters indicate significant differences between treatments as determined using Tukey's HSD test ( $P<0.05$ ).

nearly  $75 \text{ mg g}^{-1}$  DW ( $2 \text{ mmol g}^{-1}$  DW) in the shoots under the 50 mM KCl treatment but, interestingly, plant growth was significantly stimulated (Figs 1, 2C). Although the  $\text{K}^+$  contents in the shoots and roots under this treatment were also higher than in the control (irrigation with half-strength Hoagland solution only) (Fig. 2A), it can be at least concluded that a  $\text{Cl}^-$  tissue content exceeding  $70 \text{ mg g}^{-1}$  DW did not exert significant toxicity effects. For most woody perennial crop and legume species, NaCl tolerance is dominated by the ability to decrease  $\text{Cl}^-$  accumulation in tissues (Luo et al., 2005; Brumós et al., 2009; Tavakkoli et al., 2010; Henderson et al., 2015). In contrast, in this study the application of 25  $\mu\text{M}$  DIDS, a  $\text{Cl}^-$ -channel blocker that inhibits its absorption in plants (Skerrett and Tyerman, 1994; Tavakkoli et al., 2011; Saleh and Plieth, 2013), had no effect on the accumulation or distribution of  $\text{NO}_3^-$ ,  $\text{K}^+$ , and  $\text{Na}^+$  but it reduced the rate of  $\text{Cl}^-$  uptake and accumulation under the 50 mM NaCl treatment, and as a result exacerbated the NaCl-induced inhibition of growth (Figs 5, 6). These results indicated that *P. cornutum* can be considered as a  $\text{Cl}^-$ -tolerant desert plant, and that the high absorption of  $\text{Cl}^-$  and its transport into the shoots constitutes a vital physiological strategy by which the plant copes with saline conditions.

NaCl is generally the predominant salt in saline soils (Teakle and Tyerman, 2010; Sun et al., 2016). To date, compared with our understanding of the molecular mechanisms of  $\text{Na}^+$  transport (Wang et al., 2007; Agarwal et al., 2013; Tang et al., 2015; Shabala et al., 2016), our knowledge of  $\text{Cl}^-$  transport

mechanisms in plants lags behind; specifically, reports on the molecular basis of uptake by roots are rare (Li et al., 2017).  $\text{Cl}^-$  transport mechanisms have been explored using glycophytes, such as Arabidopsis, soybean, and citrus and the main trait associated with tolerance in these species is the prevention of  $\text{Cl}^-$  accumulation in the shoots, which is mainly achieved by reducing the net uptake by roots and/or the net xylem loading in the roots (Teakle and Tyerman, 2010; Wege et al., 2017). This process of  $\text{Cl}^-$  exclusion may therefore prevent us from understanding the mechanisms of uptake by roots and root-to-shoot transport in such plants. In contrast, as a succulent xerophyte, *P. cornutum* can absorb a large amount of  $\text{Cl}^-$  via its roots and then efficiently transport  $\sim 70$ – $85\%$  of the total amount to the shoots as a growth stimulator under NaCl stress conditions (as calculated according to the contents in the roots and shoots in the present study and from the data of Yue et al., 2016a). Thus, *P. cornutum* may be a useful model for characterizing  $\text{Cl}^-$  uptake and root-to-shoot transport mechanisms *in planta*.

#### *Cl⁻ is an essential osmoticum that is beneficial for the growth of P. cornutum under saline conditions*

High external concentrations of salt in the growing medium rapidly cause osmotic stress, inducing a water deficit that adversely affects plant growth (Munns and Tester, 2008; Tavakkoli et al., 2010). Osmotic adjustment (OA) is one of the main physiological adaptations employed by plants when confronted

with salt and other osmotic stresses and acts to decrease tissue osmotic potential ( $\Psi_s$ ) to enable continued water influx and turgor maintenance. OA is determined by the net accumulation of various osmotica, including inorganic cations and anions as well as organic solutes (Farooq *et al.*, 2009; Shabala and Shabala, 2011; Raza *et al.*, 2012; Ahmad *et al.*, 2013; Zhang *et al.*, 2016). In the present study, the leaf OA capacity of *P. cornutum* under the KCl treatment was greater than that under the KNO<sub>3</sub> treatment, as evidenced by better leaf hydration and lower leaf  $\Psi_s$  in response to KCl (Fig. 1E, Table 1). In terms of the major osmotica, the K<sup>+</sup> and Na<sup>+</sup> contents of the shoots was the same between the treatments; however, in the KCl treatment, ~2 mmol g<sup>-1</sup> DW Cl<sup>-</sup> and ~1.5 mmol g<sup>-1</sup> DW NO<sub>3</sub><sup>-</sup> accumulated in the shoots, whereas in the KNO<sub>3</sub> treatment only trace amounts of Cl<sup>-</sup> and ~2.5 mmol g<sup>-1</sup> DW NO<sub>3</sub><sup>-</sup> were accumulated (Fig. 2). Interestingly, the contents of organic osmotica in the leaves, namely free proline, soluble sugars, betaine, and malate, were the same under the KCl treatment as under the KNO<sub>3</sub> treatment (Supplementary Fig. S3). Thus, the higher OA capacity in the plants treated with KCl compared to those treated with KNO<sub>3</sub> was mainly attributable to the higher accumulation of Cl<sup>-</sup> in the shoots.

Cl<sup>-</sup> is classified as a micronutrient, with tissue concentrations in most plant species ranging between 2.8–5.5  $\mu\text{mol g}^{-1}$  DW (100–200  $\mu\text{g g}^{-1}$  DW) (Wege *et al.*, 2017; Geilfus, 2018). Interestingly, recent studies in tobacco have indicated that high tissue contents of Cl<sup>-</sup> at macronutrient levels are conducive to increased leaf turgor potential and hence stimulate leaf cell expansion, leading to an increase in biomass under non-saline conditions (Franco-Navarro *et al.*, 2016, 2019). In our current study, the high OA capacity of *P. cornutum* under the 50 mM KCl treatment improved the hydration status of the leaves and facilitated the generation of leaf turgor (Table 1). Concomitantly, the expansion of leaf cells was enhanced, resulting in a greater leaf surface area and increased leaf thickness (Figs 3, 4), which would in turn increase overall photosynthesis and hence increase the biomass. Similarly, under the 50 mM NaCl treatment the leaf hydration and turgor were improved compared with plants under the 50 mM NaNO<sub>3</sub> treatment (Figs 3, 4, Table 1), and this was strongly associated with Cl<sup>-</sup> accumulation in the shoots under the NaCl treatment. The suppression of Cl<sup>-</sup> accumulation in the shoots by application of DIDS in the 50 mM NaCl treatment resulted in a decline in the contribution of Cl<sup>-</sup> to leaf OA (from 20% to ~8%), which resulted in reductions in shoot water content, photosynthetic rate, and overall plant growth (Figs 5, 6A, Table 2). Taken together, these results indicated that Cl<sup>-</sup> is an essential osmoticum that plays a vital role in OA in *P. cornutum*, resulting in improved leaf hydration and photosynthetic activity, and hence improved growth under saline conditions. Plants use Cl<sup>-</sup> as a beneficial osmoticum by sequestering the majority into the central vacuole, and this process is currently thought to be mediated by the tonoplast-localized chloride channel CLCg (White and Broadley, 2001; Teakle and Tyerman, 2010; Nguyen *et al.*, 2016). The transcript levels of *PcCLCg* in the shoots of *P. cornutum* are highly up-regulated under treatment with 50 mM NaCl (Cui *et al.*, 2019), and hence the sequestration of Cl<sup>-</sup> into the cell vacuole to enhance OA is a vital strategy for *P. cornutum* plants

growing under saline conditions. In saline environments, the shoot Cl<sup>-</sup> content in most crop species unavoidably accumulates to extremely high levels, and this particularly restricts the productivity of many crop species, such as soybean and perennial woody species (Li *et al.*, 2017). The genetic manipulation of crops by incorporating gene resources from *P. cornutum*, such as *PcCLCg*, would be very promising for improving salt tolerance, via enhancing OA capacity and thus improving leaf hydration and photosynthetic activity.

It is well known that Na<sup>+</sup> toxicity is one of the primary factors inhibiting plant growth under saline conditions as it results in cell membrane dysfunction, attenuation of metabolic activity, and inhibition of photosynthesis (Kronzucker *et al.*, 2013). For most glycophytes, less than 40 mM external Na<sup>+</sup> severely impairs growth and photosynthesis (Munns and Tester, 2008). The Na<sup>+</sup> tolerance of plants is strongly associated with their ability to transport, exclude, and/or mobilize Na<sup>+</sup> (Apse and Blumwald, 2007), which at the cellular level is mainly achieved by extruding Na<sup>+</sup> to the outside of the cell and/or sequestering it into the vacuole to reduce accumulation in the cytoplasm (Munns and Tester, 2008). Intracellular sequestration in particular contributes not only to reducing the deleterious effects of excess Na<sup>+</sup> in the cytoplasm but also to enhancing the OA capacity in order to maintain the osmotic balance within cells (Munns and Tester, 2008). The sequestration of K<sup>+</sup> into vacuoles also plays a crucial role in OA under salt stress in most plant species (Gierth and Maser, 2007; Agarwal *et al.*, 2013; Tang *et al.*, 2015). Our results showed that under treatment with 50 mM NaCl, *P. cornutum* accumulated large amounts of Na<sup>+</sup> in its shoots, and its contribution to leaf  $\Psi_s$  was greater than 20% (Fig. 6D, Table 2). Although the tissue K<sup>+</sup> content was significantly decreased compared with the control, its contribution to leaf  $\Psi_s$  was nearly 25% (Fig. 6E, Table 2), suggesting that Na<sup>+</sup> and K<sup>+</sup> both also function in the OA of *P. cornutum* in response to NaCl. We have recently found that the expression of the tonoplast Na<sup>+</sup>/H<sup>+</sup> antiporter gene *PcNHX1*, which encodes a protein mediating Na<sup>+</sup> and/or K<sup>+</sup> transport into vacuoles, is up-regulated in the shoots of *P. cornutum* under treatment with 50 mM NaCl (Cui *et al.*, 2019), and hence the vacuolar compartmentalization of Na<sup>+</sup> and/or K<sup>+</sup> may also be vital to its salt tolerance. The transport of Na<sup>+</sup> and K<sup>+</sup> into the vacuole is coupled with an increased influx of anionic solutes such as NO<sub>3</sub><sup>-</sup>, Cl<sup>-</sup>, and malate to enhance the OA capacity and to balance the positive electrical charge in the vacuole (Munns and Tester, 2008; Shabala and Shabala, 2011; Franco-Navarro *et al.*, 2016). It has been speculated that Cl<sup>-</sup> can replace NO<sub>3</sub><sup>-</sup> and malate as an osmoticum to liberate them for use in other functions (Flowers, 1988; Wege, 2017). Given that NO<sub>3</sub><sup>-</sup> was the predominant nitrogen resource for *P. cornutum* in our study and that malate is mainly used in carbon assimilation and the regulation of metabolic processes in the cytoplasm (Scheibe, 2004), the sequestration of Cl<sup>-</sup> in the vacuole may not only be essential for OA but also contribute to retaining more NO<sub>3</sub><sup>-</sup> and malate in the cytoplasm in order to sustain successful photosynthesis and metabolism under saline conditions.

For most glycophytes such as cotton, wheat and tobacco, the contribution of organic osmotica to leaf  $\Psi_s$  can reach ~30%

(Kameli and Lösel, 1995; Meloni *et al.*, 2001; Franco-Navarro *et al.*, 2016). By contrast, organic osmotica may not be essential for OA in *P. cornutum*, as the total contribution of free proline and soluble sugars to leaf  $\Psi_s$  was barely 5% (Table 2). A high dependence on organic solutes for OA would result in a potential growth penalty, as the ATP consumed by the synthesis of compatible organic solutes such as proline and sucrose is 10 times higher than the uptake of inorganic ions from the external surroundings (Munns and Tester, 2008). Hence, *P. cornutum* may have evolved to efficiently use the inorganic ions present in its habitat as a 'cheap' osmoticum to adapt to salt stress.

#### *P. cornutum* exhibits a strong capacity for maintaining shoot $\text{NO}_3^-$ homeostasis under saline conditions

$\text{NO}_3^-$  is the major nitrogen source that serves as an essential building block for fundamental biological molecules in higher plants (Lin *et al.*, 2008; Wang *et al.*, 2012). The uptake and storage of  $\text{NO}_3^-$  under saline conditions is generally antagonized by the uptake of  $\text{Cl}^-$  due to competition between the two ions for the major binding sites of transmembrane channels or transporters (Tyerman and Skerrett, 1999; Li *et al.*, 2017; Reich *et al.*, 2017). For most glycophytes, and even some halophytes such as *Suaeda salsa*, increased  $\text{Cl}^-$  uptake is typically accompanied by a significant reduction in shoot  $\text{NO}_3^-$  content (Song *et al.*, 2009; Tachy *et al.*, 2015; Franco-Navarro *et al.*, 2016; Reich *et al.*, 2017). However, in *P. cornutum* under the 50 mM NaCl treatment in the present study, although large amounts of  $\text{Cl}^-$  were absorbed and transported into the shoots, neither the shoot nor root  $\text{NO}_3^-$  contents declined (Figs 2C, D, 6A, C). Moreover, even though there was a greater increase in shoot  $\text{Cl}^-$  content under the 50 mM KCl treatment, the  $\text{NO}_3^-$  content was still maintained at a high level in the shoots (Fig. 2C, D). This suggests that *P. cornutum* has a strong capacity to transport  $\text{NO}_3^-$  from the roots to maintain shoot  $\text{NO}_3^-$  homeostasis in the presence of high  $\text{Cl}^-$  accumulation. The nitrate transporter NRT1.5/NPF7.3 has been shown to be an important protein that mediates root-to-shoot transport of  $\text{NO}_3^-$  in plants (Lin *et al.*, 2008). In Arabidopsis, the expression of *AtNRT1.5/AtNPF7.3* in the roots is down-regulated in response to NaCl treatment (Chen *et al.*, 2012); however, the expression of *PcNRT1.5/PcNPF7.3* in the roots of *P. cornutum* is maintained at a constant level under 50 mM NaCl treatment (Cui *et al.*, 2019). Therefore, the enhanced ability for long-distance transport of  $\text{NO}_3^-$  mediated by NRT1.5/NPF7.3 may be another important trait in the salt tolerance of *P. cornutum*.

#### NaCl alleviates the detrimental effects of osmotic stress on *P. cornutum* due to strong osmotic adjustment capacity elicited by $\text{Cl}^-$ accumulation

Some xero-halophyte species, such as *Atriplex canescens*, *A. halimus*, *Sesuvium portulacastrum*, and *Z. xanthoxylum*, can adapt well to halomorphic arid soils (Glenn and Brown, 1998; Wang *et al.*, 2004; Slama *et al.*, 2007). It has been demonstrated that the accumulation of  $\text{Na}^+$  can mitigate the detrimental

effects of osmotic or drought stress on the growth of these species by enhancing the OA capacity (Martínez *et al.*, 2005; Slama *et al.*, 2007; Ma *et al.*, 2012; Guo *et al.*, 2020), while it seems that the accumulation of  $\text{Cl}^-$  does not have such mitigative effects (Martínez *et al.*, 2005). In our current study, both in control conditions and under 25 mM NaCl treatment, the imposition of  $-0.3$  MPa osmotic stress by the addition of sorbitol significantly increased the  $\text{Cl}^-$  uptake rate, shoot  $\text{Cl}^-$  content, and contribution of  $\text{Cl}^-$  to leaf  $\Psi_s$ , but it did not affect the tissue  $\text{Na}^+$  content or its contribution to leaf  $\Psi_s$  (Fig. 8, Table 3, Supplementary Fig. S7A). This suggests that *P. cornutum* preferentially absorbs and accumulates more  $\text{Cl}^-$  in its shoots for OA under drought stress. Interestingly, the addition of 25 mM NaCl could improve the growth of *P. cornutum* under the osmotic stress (Fig. 7). When the uptake of  $\text{Cl}^-$  was blocked by DIDS, NaCl could not alleviate the inhibition of growth induced by the osmotic stress, as a result of the decreased contribution of  $\text{Cl}^-$  to leaf  $\Psi_s$  (Figs 7, 8, Table 3). These results suggested that the accumulation of  $\text{Cl}^-$  in the shoots in order to enhance the OA capacity represents a novel strategy in the drought resistance of *P. cornutum*. The addition of sorbitol did not enhance the accumulation of  $\text{Na}^+$  or  $\text{NO}_3^-$  and significantly decreased the shoot  $\text{K}^+$  content under both the control condition and 25 mM NaCl treatment (Supplementary Fig. S7A–C), but these ions were also important contributors to leaf OA (Table 3). This indicates that although  $\text{Cl}^-$  is an indispensable osmoticum for *P. cornutum* to adapt to drought stress, the contribution of other ions should not be underestimated.

The presence of NaCl could induce the opening of stomatal pores to improve photosynthesis under osmotic stress (Supplementary Fig. S6A, B), which may have mainly resulted from the favourable tissue water content induced by  $\text{Cl}^-$  accumulation that allowed the maintenance of regular metabolism. The aperture of stomatal pores is regulated by changes in the osmotic potential of guard cells, and the accumulation of  $\text{K}^+$  in the vacuole of these cells is essential for stomatal opening (Hetherington, 2001; Roelfsema and Hedrich, 2005). This process can be achieved only with the concomitant transport of anionic solutes into the vacuole of the guard cells to balance the positive charges (Kim *et al.*, 2010; De Angeli *et al.*, 2013). In most plant species, malate is used for stomatal opening (Andersson *et al.*, 1984). For halophytes,  $\text{Cl}^-$  is thought to be more useful in stomatal opening because its transport across guard cell membranes and tonoplasts is metabolically less expensive than the biosynthesis of malate (Bazihizina *et al.*, 2019). The accumulation of  $\text{Cl}^-$  may therefore play an important role in reducing the energy costs associated with photosynthesis in *P. cornutum* under osmotic stress.

In conclusion, *Pugionium cornutum* is a xerophytic  $\text{Cl}^-$ -tolerant species, and its large accumulation of  $\text{Cl}^-$  provides a beneficial osmoticum that can improve leaf hydration status and photosynthetic activity, resulting in increased tolerance to salt and osmotic stresses. Accumulation of  $\text{K}^+$ ,  $\text{Na}^+$ , and  $\text{NO}_3^-$  in the shoots is also essential for *P. cornutum* to adapt to these stresses.  $\text{Cl}^-$  toxicity is a major factor in crop salt stress, and research into its effects have been neglected relative to the

effects of Na<sup>+</sup>. We investigated the Cl<sup>-</sup>-tolerant characteristics and the beneficial role of Cl<sup>-</sup> in the salt and drought tolerance of *P. cornutum*. Future studies on the molecular mechanisms underlying the abiotic stress tolerance of *P. cornutum*, especially Cl<sup>-</sup> translocation, would be of great potential value for improving the agricultural productivity of crop species in saline environments, and ultimately help to meet the demand for food security worldwide.

## Supplementary data

Supplementary data are available at *JXB* online.

Fig. S1. Growth of *P. cornutum* seedlings irrigated with half-strength Hoagland solution containing 20 μM Cl<sup>-</sup>.

Fig. S2. Net photosynthesis rate, stomatal conductance, and chlorophyll *a* and *b* contents under KCl, KNO<sub>3</sub>, NaNO<sub>3</sub>, and NaCl treatments.

Fig. S3. Leaf free proline, soluble sugar, betaine, and malate contents under KCl, KNO<sub>3</sub>, NaNO<sub>3</sub>, and NaCl treatments.

Fig. S4. Effects of DIDS on chlorophyll *a* and *b* contents under the 50 mM NaCl treatment.

Fig. S5. Effects of DIDS on leaf free proline and soluble sugar contents under the 50 mM NaCl treatment.

Fig. S6. Net photosynthesis rate, stomatal conductance, intrinsic water use efficiency, and chlorophyll *a* and *b* contents under osmotic stress alone or together with 25 mM NaCl.

Fig. S7. Contents of Na<sup>+</sup>, K<sup>+</sup>, NO<sub>3</sub><sup>-</sup>, free proline, and soluble sugars under osmotic stress alone or together with 25 mM NaCl.

## Acknowledgements

This work was financially supported by the National Natural Science Foundation of China (grant no. 31730093), the Fundamental Research Funds for the Central Universities (grant nos lzujbky-2019-40, lzujbky-2018-k01, and lzujbky-2018-it15), and the National Key Research and Development Program of China (grant no. 2017YFC0504804).

## References

- Agarwal PK, Shukla PS, Gupta K, Jha B.** 2013. Bioengineering for salinity tolerance in plants: state of the art. *Molecular Biotechnology* **54**, 102–123.
- Ahmad R, Lim CJ, Kwon SY.** 2013. Glycine betaine: a versatile compound with great potential for gene pyramiding to improve crop plant performance against environmental stresses. *Plant Biotechnology Reports* **7**, 49–57.
- Andersson B, Critchley C, Ryrie IJ, Jansson C, Larsson C, Anderson JM.** 1984. Modification of the chloride requirement for photosynthetic O<sub>2</sub> evolution: the role of the 23 kDa polypeptide. *FEBS Letters* **168**, 113–117.
- Apse MP, Blumwald E.** 2007. Na<sup>+</sup> transport in plants. *FEBS Letters* **581**, 2247–2254.
- Bates LS, Waldren RP, Teare ID.** 1973. Rapid determination of free proline for water-stress studies. *Plant and Soil* **39**, 205–207.
- Bazihizina N, Colmer TD, Cuin TA, Mancuso S, Shabala S.** 2019. Friend or foe? Chloride patterning in halophytes. *Trends in Plant Science* **24**, 142–151.
- Brumós J, Colmenero-Flores JM, Conesa A, Izquierdo P, Sánchez G, Iglesias DJ, López-Climent MF, Gómez-Cadenas A, Talón M.** 2009. Membrane transporters and carbon metabolism implicated in chloride

homeostasis differentiate salt stress responses in tolerant and sensitive *Citrus* rootstocks. *Functional & Integrative Genomics* **9**, 293–309.

**Chang GJ, Liu RX, Ha Q, Li YY, Zhu L.** 2013. Study on the correlation between soil salinity ions content and water content of the *Reaumuria soongorica* Desert in Alxa Zuoqi of Inner Mongolia. *Animal Husbandry and Feed Science* **34**, 38–42.

**Chen CZ, Lv XF, Li JY, Yi HY, Gong JM.** 2012. Arabidopsis NRT1.5 is another essential component in the regulation of nitrate reallocation and stress tolerance. *Plant Physiology* **159**, 1582–1590.

**Cui YN, Wang FZ, Yang CH, Yuan JZ, Guo H, Zhang JL, Wang SM, Ma Q.** 2019. Transcriptomic profiling identifies candidate genes involved in the salt tolerance of the xerophyte *Pugionium cornutum*. *Genes* **10**, 1039.

**De Angeli A, Zhang J, Meyer S, Martinoia E.** 2013. AtALMT9 is a malate-activated vacuolar chloride channel required for stomatal opening in Arabidopsis. *Nature Communications* **4**, 1804.

**Deinlein U, Stephan AB, Horie T, Luo W, Xu G, Schroeder JI.** 2014. Plant salt-tolerance mechanisms. *Trends in Plant Science* **19**, 371–379.

**Drechsler N, Zheng Y, Bohner A, Nobmann B, von Wirén N, Kunze R, Rausch C.** 2015. Nitrate-dependent control of shoot K homeostasis by the nitrate transporter1/peptide transporter family member NPF7.3/NRT1.5 and the Stelar K<sup>+</sup> Outward Rectifier SKOR in Arabidopsis. *Plant Physiology* **169**, 2832–2847.

**Farooq M, Wahid A, Kobayashi N, Fujita D, Basra SMA.** 2009. Plant drought stress: effects, mechanisms and management. *Agronomy for Sustainable Development* **29**, 185–212.

**Flowers TJ.** 1988. Chloride as a nutrient and as an osmoticum. *Advances in Plant Nutrition* **3**, 55–78.

**Franco-Navarro JD, Brumós J, Rosales MA, Cubero-Font P, Talón M, Colmenero-Flores JM.** 2016. Chloride regulates leaf cell size and water relations in tobacco plants. *Journal of Experimental Botany* **67**, 873–891.

**Franco-Navarro JD, Rosales MA, Cubero-Font P, Calvo P, Álvarez R, Diaz-Espejo A, Colmenero-Flores JM.** 2019. Chloride as a macronutrient increases water-use efficiency by anatomically driven reduced stomatal conductance and increased mesophyll diffusion to CO<sub>2</sub>. *The Plant Journal* **99**, 815–831.

**Geilfus CM.** 2018. Review on the significance of chlorine for crop yield and quality. *Plant Science* **270**, 114–122.

**Gibon Y, Bessieres MA, Larher F.** 1997. Is glycine betaine a non-compatible solute in higher plants that do not accumulate it? *Plant, Cell & Environment* **20**, 329–340.

**Gierth M, Mäser P.** 2007. Potassium transporters in plants – involvement in K<sup>+</sup> acquisition, redistribution and homeostasis. *FEBS Letters* **581**, 2348–2356.

**Glenn E, Brown J.** 1998. Effects of soil salt levels on the growth and water use efficiency of *Atriplex canescens* (Chenopodiaceae) varieties in drying soil. *American Journal of Botany* **85**, 10.

**Guerrier G.** 1996. Fluxes of Na<sup>+</sup>, K<sup>+</sup> and Cl<sup>-</sup>, and osmotic adjustment in *Lycopersicon pimpinellifolium* and *L. esculentum* during short- and long-term exposures to NaCl. *Plant Physiology* **97**, 583–591.

**Guo H, Cui YN, Pan YQ, Wang SM, Bao AK.** 2020. Sodium chloride facilitates the secretohalophyte *Atriplex canescens* adaptation to drought stress. *Plant Physiology and Biochemistry* **150**, 99–108.

**Henderson SW, Wege S, Qiu J, Blackmore DH, Walker AR, Tyerman SD, Walker RR, Gilliam M.** 2015. Grapevine and Arabidopsis cation-chloride cotransporters localize to the Golgi and trans-Golgi network and indirectly influence long-distance ion transport and plant salt tolerance. *Plant Physiology* **169**, 2215–2229.

**Hetherington AM.** 2001. Guard cell signaling. *Cell* **107**, 711–714.

**Inskeep WP, Bloom PR.** 1985. Extinction coefficients of chlorophyll *a* and *b* in *N,N*-dimethylformamide and 80% acetone. *Plant Physiology* **77**, 483–485.

**Kameli A, Lösel DM.** 1995. Contribution of carbohydrates and other solutes to osmotic adjustment in wheat leaves under water stress. *Journal of Plant Physiology* **145**, 363–366.

**Kim TH, Böhmer M, Hu H, Nishimura N, Schroeder JI.** 2010. Guard cell signal transduction network: advances in understanding abscisic acid, CO<sub>2</sub>, and Ca<sup>2+</sup> signaling. *Annual Review of Plant Biology* **61**, 561–591.

- Kronzucker HJ, Coskun D, Schulze LM, Wong JR, Britto DT.** 2013. Sodium as nutrient and toxicant. *Plant and Soil* **369**, 1–23.
- Langdale JA.** 1994. *In situ* hybridization. In: Freeling M, Walbot V, eds. The maize handbook. New York: Springer-Verlag, 165–179.
- Li B, Tester M, Gilliam M.** 2017. Chloride on the move. *Trends in Plant Science* **22**, 236–248.
- Li H, Li C, Zhang C, Chen B, Hui L, Shen Y.** 2015. Compositional and gastrointestinal prokinetic studies of *Pugionium* (L.). *Food Chemistry* **186**, 285–291.
- Lin SH, Kuo HF, Canivenc G, et al.** 2008. Mutation of the Arabidopsis *NRT1.5* nitrate transporter causes defective root-to-shoot nitrate transport. *The Plant Cell* **20**, 2514–2528.
- Luo Q, Yu B, Liu Y.** 2005. Differential sensitivity to chloride and sodium ions in seedlings of *Glycine max* and *G. soja* under NaCl stress. *Journal of Plant Physiology* **162**, 1003–1012.
- Ma Q, Yue LJ, Zhang JL, Wu GQ, Bao AK, Wang SM.** 2012. Sodium chloride improves photosynthesis and water status in the succulent xerophyte *Zygophyllum xanthoxylum*. *Tree Physiology* **32**, 4–13.
- Martínez JP, Kinet JM, Bajji M, Lutts S.** 2005. NaCl alleviates polyethylene glycol-induced water stress in the halophyte species *Atriplex halimus* L. *Journal of Experimental Botany* **56**, 2421–2431.
- Meloni DA, Oliva MA, Ruiz HA, Martínez, CA.** 2001. Contribution of proline and inorganic solutes to osmotic adjustment in cotton under salt stress. *Journal of Plant Nutrition* **24**, 599–612.
- Munns R, James RA, Xu B, et al.** 2012. Wheat grain yield on saline soils is improved by an ancestral Na<sup>+</sup> transporter gene. *Nature Biotechnology* **30**, 360–364.
- Munns R, Tester M.** 2008. Mechanisms of salinity tolerance. *Annual Review of Plant Biology* **59**, 651–681.
- Nguyen CT, Agorio A, Jossier M, Depré S, Thomine S, Filleur S.** 2016. Characterization of the chloride channel-like, AtCLCG, involved in chloride tolerance in *Arabidopsis thaliana*. *Plant & Cell Physiology* **57**, 764–775.
- Ning YW, Zhang YC, Wu JG, Li QK.** 2001. Chloride in soil-plant systems and some questions in chloride-fertilizer application. *Chinese Journal of Soil Science* **32**, 222–224.
- Nxele X, Klein A, Ndimba BK.** 2017. Drought and salinity stress alters ROS accumulation, water retention, and osmolyte content in sorghum plants. *South African Journal of Botany* **108**, 261–266.
- Pan YQ, Guo H, Wang SM, Zhao B, Zhang JL, Ma Q, Yin HJ, Bao AK.** 2016. The photosynthesis, Na<sup>+</sup>/K<sup>+</sup> homeostasis and osmotic adjustment of *Atriplex canescens* in response to salinity. *Frontiers in Plant Science* **7**, 848.
- Pe'er S, Cohen Y.** 1987. Sugar accumulation in tobacco plants systemically protected against blue mold (*Peronospora tabacina*). *Phytoparasitica* **15**, 307–315.
- Ran F, Wu CC, Peng GQ, Korpelainen H, Li CY.** 2010. Physiological differences in *Rhododendron calophytum* seedlings regenerated in mineral soil or on fallen dead wood of different decaying stages. *Plant and Soil* **337**, 205–215.
- Raven JA.** 2017. Chloride: essential micronutrient and multifunctional beneficial ion. *Journal of Experimental Botany* **38**, 359–367.
- Raza MAS, Saleem MF, Ashraf MY, Ali A, Asghar HN.** 2012. Glycinebetaine applied under drought improved the physiological efficiency of wheat (*Triticum aestivum* L.) plant. *Plant, Soil and Environment* **31**, 67–71.
- Reich M, Aghajanzadeh T, Helm J, Parmar S, Hawkesford MJ, De Kok LJ.** 2017. Chloride and sulfate salinity differently affect biomass, mineral nutrient composition and expression of sulfate transport and assimilation genes in *Brassica rapa*. *Plant and Soil* **411**, 319–332.
- Roelfsema MRG, Hedrich R.** 2005. In the light of stomatal opening: new insights into 'the Watergate'. *The New Phytologist* **167**, 665–691.
- Saleh L, Plieth C.** 2013. A9C sensitive Cl<sup>-</sup>-accumulation in *A. thaliana* root cells during salt stress is controlled by internal and external calcium. *Plant Signaling and Behavior* **8**, e24289-1–8.
- Scheibe R.** 2004. Malate valves to balance cellular energy supply. *Physiologia Plantarum* **120**, 21–26.
- Shabala S.** 2013. Learning from halophytes: physiological basis and strategies to improve abiotic stress tolerance in crops. *Annals of Botany* **112**, 1209–1221.
- Shabala S, Bose J, Fuglsang AT, Pottosin I.** 2016. On a quest for stress tolerance genes: membrane transporters in sensing and adapting to hostile soils. *Journal of Experimental Botany* **67**, 1015–1031.
- Shabala S, Shabala L.** 2011. Ion transport and osmotic adjustment in plants and bacteria. *Biomolecular Concepts* **2**, 407–419.
- Skerrett M, Tyerman SD.** 1994. A channel that allows inwardly directed fluxes of anions in protoplasts derived from wheat roots. *Planta* **192**, 295–305.
- Slama I, Ghnaya T, Messedi D, Hessini K, Labidi N, Savoure A, Abdelly C.** 2007. Effect of sodium chloride on the response of the halophyte species *Sesuvium portulacastrum* grown in mannitol-induced water stress. *Journal of Plant Research* **120**, 291–299.
- Song J, Chen M, Feng G, Jia YH, Wang BS, Zhang FS.** 2009. Effect of salinity on growth, ion accumulation and the roles of ions in osmotic adjustment of two populations of *Suaeda salsa*. *Plant and Soil* **314**, 133–141.
- Sun ZW, Ren LK, Fan JW, et al.** 2016. Salt response of photosynthetic electron transport system in wheat cultivars with contrasting tolerance. *Plant, Soil and Environment* **62**, 515–521.
- Tahjib-Ul-Arif M, Sohag AAM, Afrin S, et al.** 2019. Differential response of sugar beet to long-term mild to severe salinity in a soil-pot culture. *Agriculture* **9**, 223.
- Tang X, Mu X, Shao H, Wang H, Brestic M.** 2015. Global plant-responding mechanisms to salt stress: physiological and molecular levels and implications in biotechnology. *Critical Reviews in Biotechnology* **35**, 425–437.
- Taochy C, Gaillard I, Ipotesi E, et al.** 2015. The Arabidopsis root stele transporter NPF2.3 contributes to nitrate translocation to shoots under salt stress. *The Plant Journal* **83**, 466–479.
- Tavakkoli E, Fatehi F, Coventry S, Rengasamy P, McDonald GK.** 2011. Additive effects of Na<sup>+</sup> and Cl<sup>-</sup> ions on barley growth under salinity stress. *Journal of Experimental Botany* **62**, 2189–2203.
- Tavakkoli E, Rengasamy P, McDonald GK.** 2010. High concentrations of Na<sup>+</sup> and Cl<sup>-</sup> ions in soil solution have simultaneous detrimental effects on growth of faba bean under salinity stress. *Journal of Experimental Botany* **61**, 4449–4459.
- Teakle NL, Tyerman SD.** 2010. Mechanisms of Cl<sup>-</sup> transport contributing to salt tolerance. *Plant, Cell & Environment* **33**, 566–589.
- Tyerman SD, Skerrett IM.** 1999. Root ion channels and salinity. *Scientia Horticulturae* **78**, 175–235.
- Ueda A, Kanechi M, Uno Y, Inagaki N.** 2003. Photosynthetic limitations of a halophyte sea aster (*Aster tripolium* L.) under water stress and NaCl stress. *Journal of Plant Research* **116**, 65–70.
- Wang CM, Zhang JL, Liu XS, Li Z, Wu GQ, Cai JY, Flowers TJ, Wang SM.** 2009. *Puccinellia tenuiflora* maintains a low Na<sup>+</sup> level under salinity by limiting unidirectional Na<sup>+</sup> influx resulting in a high selectivity for K<sup>+</sup> over Na<sup>+</sup>. *Plant, Cell & Environment* **32**, 486–496.
- Wang P, Wang F, Yang J.** 2017. *De novo* assembly and analysis of the *Pugionium cornutum* (L.) Gaertn. transcriptome and identification of genes involved in the drought response. *Gene* **626**, 290–297.
- Wang SM, Wan CG, Wang YR, Chen H, Zhou ZY, Fu H, Sosebee RE.** 2004. The characteristics of Na<sup>+</sup>, K<sup>+</sup> and free proline distribution in several drought-resistant plants of the Alxa Desert, China. *Journal of Arid Environments* **56**, 525–539.
- Wang SM, Zhang JL, Flowers TJ.** 2007. Low-affinity Na<sup>+</sup> uptake in the halophyte *Suaeda maritima*. *Plant Physiology* **145**, 559–571.
- Wang YY, Hsu PK, Tsay YF.** 2012. Uptake, allocation and signaling of nitrate. *Trends in Plant Science* **17**, 458–467.
- Wege S, Gilliam M, Henderson SW.** 2017. Chloride: not simply a 'cheap osmoticum', but a beneficial plant macronutrient. *Journal of Experimental Botany* **68**, 3057–3069.
- White PJ, Broadley MR.** 2001. Chloride in soils and its uptake and movement within the plant: a review. *Annals of Botany* **88**, 967–988.
- Xu GH, Magen H, Tarchitzky J, Kafkafi U.** 2000. Advances in chloride nutrition of plants. *Advances in Agronomy* **68**, 96–150.
- Yan Y, Jing X, Tang H, Li X, Gong B, Shi Q.** 2019. Using transcriptome to discover a novel melatonin-induced sodic alkaline stress resistant pathway in *Solanum lycopersicum* L. *Plant & Cell Physiology* **60**, 2051–2064.



- Yang CW, Shi DC, Wang DL.** 2008. Comparative effects of salt and alkali stresses on growth, osmotic adjustment and ionic balance of an alkali-resistant halophyte *Suaeda glauca* (Bge.). *Plant Growth Regulation* **56**, 179–190.
- Yu QS, Wang Q, Wang AL, Wu GL, Liu JQ.** 2010. Interspecific delimitation and phylogenetic origin of *Pugionium* (Brassicaceae). *Journal of Systematics and Evolution* **48**, 195–206.
- Yue LJ, Cui YN, Yuan K, Kang JJ, Wang SM.** 2016a. The osmotic adjustment in *Pugionium cornutum* subjected to salt stress. *Plant Physiology Journal* **52**, 569–574.
- Yue LJ, Li SX, Ma Q, Zhou XR, Wu GQ, Bao AK, Zhang JL, Wang SM.** 2012. NaCl stimulates growth and alleviates water stress in the xerophyte *Zygophyllum xanthoxylum*. *Journal of Arid Environments* **87**, 153–160.
- Yue LJ, Yuan K, Li HW, Kang JJ, Wang SM.** 2016b. Adaptive responses of eremophyte *Pugionium cornutum* seedlings to different concentrations of NaCl. *Acta Prataculturae Sinica* **25**, 144–152.
- Zhang D, Tong J, He X, Xu Z, Xu L, Wei P, Huang Y, Brestic M, Ma H, Shao H.** 2016. A novel soybean intrinsic protein gene, GmTIP2;3, involved in responding to osmotic stress. *Frontiers in Plant Science* **6**, 1237.
